# Supplementary material for: Characterization of the Intrinsic Phospholipase A1 Activity of Bordetella pertussis Adenylate Cyclase Toxin
Source: PubMed Central journal article supplement (PMC6316389; doi:10.3390/toxins10120514), 2018-12-04
Supplement: toxins-10-00514-s001.pdf [file toxins-10-00514-s001.pdf]

| Accession | Description     | Score | Coverage | # Proteins | # Unique Pep | # Peptides |
|-----------|-----------------|-------|----------|------------|--------------|------------|
| P00350    | 6-phosphoglu    | 57.87 | 47.44%   | 1          | 19           | 19         |
| P00509    | Aspartate ami   | 25.08 | 35.61%   | 1          | 10           | 10         |
| C4ZRS7    | Acetyl-coenzy   | 6.7   | 10.03%   | 1          | 2            | 2          |
| P24182    | Biotin carboxy  | 5.36  | 5.57%    | 1          | 2            | 2          |
| P0A9Q5    | Acetyl-coenzy   | 10.87 | 28.95%   | 1          | 8            | 8          |
| P0A9G6    | Isocitrate lyas | 2.39  | 2.53%    | 1          | 1            | 1          |
| P0CK95    | Putative lipop  | 3.36  | 1.25%    | 1          | 1            | 1          |
| P0A6A3    | Acetate kinas   | 5.58  | 6.75%    | 1          | 2            | 2          |
| P25516    | Aconitate hyd   | 12.05 | 6.62%    | 1          | 4            | 4          |
| P36683    | Aconitate hyd   | 38.02 | 21.97%   | 1          | 15           | 15         |
| P21515    | Acyl carrier pr | 1.96  | 6.74%    | 1          | 1            | 1          |
| P0A6A8    | Acyl carrier pr | 4.28  | 33.33%   | 1          | 2            | 2          |
| P0AE06    | Multidrug effl  | 27.19 | 33.75%   | 1          | 9            | 9          |
| P0ACS9    | HTH-type trar   | 14.76 | 26.98%   | 1          | 6            | 6          |
| P27550    | Acetyl-coenzy   | 15.92 | 14.57%   | 1          | 7            | 7          |
| P0A9Q7    | Aldehyde-alcc   | 27.09 | 15.71%   | 1          | 11           | 11         |
| P0AE08    | Alkyl hydrope   | 11.83 | 35.29%   | 1          | 5            | 5          |
| P00561    | Bifunctional a  | 28.69 | 18.29%   | 1          | 11           | 11         |
| P00562    | Bifunctional a  | 10.05 | 6.54%    | 1          | 4            | 4          |
| P0A959    | Glutamate-py    | 2.04  | 2.47%    | 1          | 1            | 1          |
| P77434    | Glutamate-py    | 7.14  | 13.11%   | 1          | 3            | 3          |
| P25553    | Lactaldehyde    | 7.66  | 10.44%   | 1          | 3            | 3          |
| P0AB71    | Fructose-bispl  | 8.03  | 12.81%   | 1          | 4            | 4          |
| C4ZRD1    | Probable cyto   | 6.62  | 12.33%   | 1          | 2            | 2          |
| P04825    | Aminopeptida    | 36.73 | 18.16%   | 1          | 12           | 12         |
| P15034    | Xaa-Pro amin    | 5.52  | 5.44%    | 1          | 2            | 2          |
| P0A9E0    | Arabinose ope   | 5.79  | 5.48%    | 1          | 2            | 2          |
| P0A6C5    | Amino-acid ac   | 2.8   | 2.03%    | 1          | 1            | 1          |
| B1XBC4    | Acetylglutama   | 1.81  | 3.50%    | 2          | 1            | 1          |
| C5A0C3    | Acetylornithir  | 8.67  | 13.32%   | 1          | 3            | 3          |
| B1XHL0    | Arginine repre  | 9.63  | 16.03%   | 1          | 1            | 1          |
| B1XBC5    | Argininosuccii  | 18.89 | 21.01%   | 1          | 8            | 8          |
| P77398    | Bifunctional p  | 72.13 | 23.94%   | 1          | 16           | 16         |
| C4ZU95    | UDP-4-amino-    | 20.66 | 24.01%   | 2          | 6            | 6          |
| C4ZU96    | Undecaprenyl    | 6.85  | 10.25%   | 1          | 3            | 3          |
| B1X8W9    | Probable 4-de   | 11.02 | 29.73%   | 1          | 5            | 5          |
| P07639    | 3-dehydroquii   | 2.06  | 3.04%    | 1          | 1            | 1          |
| P22106    | Asparagine sy   | 2.24  | 1.26%    | 1          | 1            | 1          |
| P0ACI6    | Regulatory pr   | 8.14  | 22.37%   | 1          | 2            | 2          |
| P0AC38    | Aspartate ami   | 13.8  | 19.46%   | 1          | 8            | 8          |
| P76216    | N-succinylargi  | 4.66  | 2.46%    | 1          | 1            | 1          |
| C4ZZA2    | N-succinylglut  | 2.06  | 2.24%    | 1          | 1            | 1          |
| P0A951    | Spermidine Ni   | 3.9   | 5.38%    | 1          | 2            | 2          |
| P0ABB0    | ATP synthase    | 31.04 | 27.68%   | 2          | 9            | 9          |
| B1X9W0    | ATP synthase    | 36.08 | 43.26%   | 1          | 14           | 14         |
| C4ZZ13    | ATP synthase    | 2     | 6.21%    | 1          | 1            | 1          |
| P0ABA0    | ATP synthase    | 15.05 | 34.62%   | 1          | 5            | 5          |
| C4ZZ11    | ATP synthase    | 2.58  | 4.88%    | 1          | 1            | 1          |
| P09053    | Valine--pyruv   | 1.78  | 2.88%    | 1          | 1            | 1          |
| P77774    | Outer membr     | 24.22 | 32.91%   | 1          | 9            | 9          |

|        |                 |       |        |   |    |    |
|--------|-----------------|-------|--------|---|----|----|
| P0A903 | Outer membr     | 28.51 | 38.08% | 1 | 9  | 9  |
| P0AC02 | Outer membr     | 21.33 | 35.92% | 1 | 7  | 7  |
| P30843 | Transcription   | 5.46  | 6.76%  | 1 | 1  | 1  |
| P30844 | Sensor protei   | 6.35  | 6.34%  | 1 | 2  | 2  |
| P37657 | Cyclic di-GMP   | 1.88  | 2.29%  | 1 | 1  | 1  |
| P00722 | Beta-galactosi  | 62.01 | 26.37% | 1 | 21 | 22 |
| Q46829 | 6-phospho-be    | 5.07  | 5.01%  | 1 | 2  | 2  |
| P61517 | Carbonic anhy   | 6.91  | 9.55%  | 1 | 2  | 2  |
| B1XBC1 | Phosphoenolp    | 37.37 | 19.25% | 1 | 15 | 15 |
| P0A6F1 | Carbamoyl-ph    | 2.13  | 7.59%  | 1 | 2  | 2  |
| P00968 | Carbamoyl-ph    | 49.21 | 26.56% | 1 | 20 | 20 |
| P21179 | Catalase HPII   | 2.47  | 2.12%  | 1 | 1  | 1  |
| P0A9H7 | Cyclopropane    | 24.43 | 24.87% | 1 | 8  | 8  |
| C5A1D5 | 60 kDa chapei   | 33.2  | 30.29% | 1 | 12 | 13 |
| C4ZU91 | CinA-like prot  | 2.23  | 3.75%  | 1 | 1  | 1  |
| P0ABH7 | Citrate syntha  | 87.82 | 51.99% | 1 | 16 | 16 |
| P0ABH9 | ATP-depende     | 1.83  | 1.58%  | 1 | 1  | 1  |
| P63284 | Chaperone pr    | 30.81 | 16.45% | 2 | 11 | 11 |
| B1XFM6 | ATP-depende     | 3.48  | 10.61% | 1 | 3  | 3  |
| B1XHD9 | tRNA U34 carl   | 1.97  | 4.02%  | 1 | 1  | 1  |
| P0ABI4 | Magnesium tr    | 8.85  | 14.87% | 1 | 2  | 2  |
| P0ACP1 | Catabolite rep  | 15.74 | 12.57% | 1 | 3  | 3  |
| P0ACJ8 | cAMP-activate   | 25.44 | 35.24% | 1 | 7  | 7  |
| P38054 | Cation efflux s | 3.46  | 2.29%  | 1 | 2  | 2  |
| P16676 | Sulfate/thiosu  | 2.35  | 10.96% | 1 | 2  | 2  |
| P0A9F3 | HTH-type trar   | 18.38 | 20.99% | 1 | 6  | 6  |
| P0A6J1 | Adenylyl-sulfa  | 2.84  | 7.46%  | 1 | 1  | 1  |
| P0A9D4 | Serine acetylt  | 16.13 | 20.88% | 1 | 4  | 4  |
| C4ZZR7 | Sulfite reduct  | 10.3  | 8.42%  | 1 | 2  | 3  |
| P0ABK5 | Cysteine syntf  | 9.08  | 8.67%  | 1 | 2  | 2  |
| C4ZZQ5 | Sulfate adeny   | 13.88 | 17.68% | 1 | 6  | 6  |
| P0AEB2 | D-alanyl-D-ala  | 8.03  | 17.62% | 1 | 5  | 5  |
| B1XA76 | D-amino acid    | 17.6  | 16.44% | 1 | 5  | 5  |
| P11557 | Cell division p | 6.31  | 6.78%  | 1 | 3  | 3  |
| P04036 | 4-hydroxy-tet   | 3.42  | 7.33%  | 1 | 2  | 2  |
| P0A9D8 | 2,3,4,5-tetra   | 2.01  | 2.55%  | 1 | 1  | 1  |
| C4ZX46 | Succinyl-diam   | 10.99 | 16.27% | 1 | 4  | 4  |
| B1X701 | dCTP deamina    | 9.87  | 17.10% | 1 | 2  | 2  |
| P24171 | Dipeptidyl car  | 10.45 | 7.34%  | 1 | 4  | 4  |
| P0AEE1 | Protein DcrB (  | 20.69 | 24.32% | 1 | 3  | 3  |
| P0A9P6 | ATP-depende     | 2.04  | 1.91%  | 1 | 1  | 1  |
| C4ZX86 | GTPase Der O    | 46.74 | 33.06% | 1 | 12 | 12 |
| P37349 | Protein-lysine  | 4.03  | 4.66%  | 1 | 2  | 2  |
| P0A9Q9 | Aspartate-sen   | 11.81 | 13.35% | 1 | 3  | 3  |
| P00370 | NADP-specific   | 15.58 | 17.90% | 1 | 7  | 7  |
| P00393 | NADH dehydr     | 1.83  | 1.84%  | 1 | 1  | 1  |
| P0AC41 | Succinate deh   | 33.93 | 21.77% | 1 | 9  | 9  |
| P07014 | Succinate deh   | 24.1  | 33.19% | 1 | 6  | 6  |
| P27296 | ATP-depende     | 1.82  | 2.23%  | 1 | 1  | 1  |
| P0A9P0 | Dihydrolipoyl   | 17.32 | 25.74% | 1 | 8  | 8  |
| P06149 | Quinone-depe    | 10.92 | 7.01%  | 1 | 4  | 4  |

|        |                 |       |        |   |    |    |
|--------|-----------------|-------|--------|---|----|----|
| P56262 | Putative carb   | 3.59  | 10.33% | 1 | 2  | 2  |
| C4ZYX9 | Chromosomal     | 10.72 | 20.34% | 1 | 8  | 8  |
| P0A6Y8 | Chaperone pr    | 77.28 | 42.95% | 1 | 20 | 20 |
| P00582 | DNA polymer:    | 5.52  | 3.02%  | 1 | 2  | 2  |
| P10443 | DNA polymer:    | 18    | 7.50%  | 1 | 6  | 6  |
| P0AAG0 | Dipeptide trar  | 5.09  | 4.89%  | 1 | 1  | 1  |
| C4ZTH7 | 1-deoxy-D-xyl   | 2.05  | 2.10%  | 1 | 1  | 1  |
| P0ADB7 | Entericidin B ( | 2.55  | 39.58% | 1 | 1  | 1  |
| P31545 | Deferrochelate  | 5.86  | 11.58% | 1 | 4  | 4  |
| C4ZUJ5 | Elongation fac  | 60.32 | 40.77% | 1 | 19 | 19 |
| P0A6P1 | Elongation fac  | 2.11  | 2.83%  | 1 | 1  | 1  |
| P0CE47 | Elongation fac  | 90.34 | 58.88% | 2 | 17 | 17 |
| P0AEJ4 | Osmolarity se   | 10.15 | 16.89% | 1 | 5  | 5  |
| P39280 | L-lysine 2,3-ar | 2.72  | 3.51%  | 1 | 1  | 1  |
| P0ACL2 | Exu regulon tr  | 5.03  | 12.40% | 1 | 2  | 2  |
| B1XEL4 | Fructose-1,6-b  | 6.31  | 9.34%  | 1 | 2  | 2  |
| B1X8Q8 | 3-hydroxydec    | 15.17 | 22.09% | 1 | 4  | 4  |
| P0A953 | 3-oxoacyl-[acy  | 2.13  | 3.20%  | 1 | 1  | 1  |
| P0AAI5 | 3-oxoacyl-[acy  | 1.96  | 3.39%  | 1 | 1  | 1  |
| P0AEK2 | 3-oxoacyl-[acy  | 2.1   | 6.97%  | 1 | 1  | 1  |
| P0A6R0 | 3-oxoacyl-[acy  | 2.08  | 4.10%  | 1 | 1  | 1  |
| P0AEK4 | Enoyl-[acyl-ca  | 5.95  | 12.60% | 1 | 3  | 3  |
| B1XBX4 | HTH-type trar   | 4.31  | 8.37%  | 3 | 1  | 1  |
| C4ZRS2 | 3-hydroxyacyl   | 3.37  | 10.60% | 1 | 1  | 1  |
| P10384 | Long-chain fai  | 1.84  | 3.81%  | 1 | 1  | 1  |
| B1XA74 | Fatty acid mei  | 4.28  | 14.64% | 1 | 2  | 2  |
| B1XB59 | Protein FdhE (  | 8.48  | 15.53% | 1 | 3  | 3  |
| P32176 | Formate dehy    | 46.72 | 19.49% | 1 | 12 | 12 |
| P0AAJ5 | Formate dehy    | 11.98 | 16.67% | 2 | 4  | 4  |
| P0ABX5 | Flagellar basa  | 1.91  | 4.23%  | 1 | 1  | 1  |
| P0ABY7 | Flagellar trans | 1.86  | 6.25%  | 1 | 1  | 1  |
| B1XGC7 | Bifunctional p  | 7.54  | 11.11% | 1 | 3  | 3  |
| C4ZT96 | Esterase FrsA   | 13.95 | 16.43% | 1 | 6  | 6  |
| P0A9A2 | Bacterial non-  | 2.52  | 4.79%  | 1 | 1  | 1  |
| P0ABH0 | Cell division p | 4.99  | 8.33%  | 1 | 2  | 2  |
| C4ZZQ2 | Cell division p | 1.9   | 13.59% | 1 | 1  | 1  |
| P0AAI3 | ATP-dependen    | 19.34 | 13.66% | 1 | 5  | 5  |
| P10121 | Signal recogni  | 18.73 | 13.48% | 1 | 7  | 7  |
| P69922 | L-fucose isom   | 19.81 | 14.89% | 1 | 5  | 5  |
| P0A9S1 | Lactaldehyde    | 1.83  | 2.88%  | 1 | 1  | 1  |
| P0AC33 | Fumarate hyd    | 15.14 | 15.15% | 2 | 7  | 7  |
| P05042 | Fumarate hyd    | 1.98  | 1.93%  | 1 | 1  | 1  |
| P0A9B2 | Glyceraldehyc   | 6.64  | 10.88% | 1 | 3  | 3  |
| P0AC53 | Glucose-6-pho   | 15.58 | 15.89% | 1 | 8  | 8  |
| B1XC24 | Glucose-6-pho   | 19.37 | 17.85% | 1 | 6  | 6  |
| P25526 | Succinate-sen   | 2.31  | 6.02%  | 1 | 2  | 2  |
| P22256 | 4-aminobutyr    | 11    | 8.22%  | 1 | 2  | 2  |
| P0A9S3 | Galactitol 1-pl | 16.05 | 23.12% | 1 | 6  | 6  |
| C4ZSI0 | D-tagatose-1,4  | 15.7  | 26.06% | 1 | 6  | 6  |
| C4ZSH9 | D-tagatose-1,4  | 84.8  | 54.05% | 1 | 14 | 14 |
| B1X7P1 | GTP cyclohydri  | 5.42  | 24.32% | 1 | 3  | 3  |

|          |                 |       |        |   |    |    |
|----------|-----------------|-------|--------|---|----|----|
| B1XEJ0   | Glycine dehyd   | 45.06 | 21.11% | 1 | 13 | 13 |
| C4ZRX4   | Glyoxylate/hy   | 8.59  | 11.54% | 1 | 2  | 3  |
| C4ZVX9   | Glycogen synt   | 10.25 | 11.53% | 1 | 4  | 4  |
| P07762   | 1,4-alpha-gluc  | 6.01  | 9.07%  | 1 | 5  | 5  |
| B1X775   | Glucose-1-pho   | 12.06 | 19.72% | 1 | 7  | 7  |
| B1X776   | Glycogen deb    | 1.83  | 1.52%  | 1 | 1  | 1  |
| C4ZVS5   | Glucokinase C   | 4.69  | 12.15% | 1 | 3  | 3  |
| B1XGY6   | Phosphogluco    | 7.18  | 7.19%  | 1 | 2  | 3  |
| P17169   | Glutamine--fr   | 26.9  | 27.91% | 1 | 13 | 13 |
| P0A9C5   | Glutamine syr   | 48.56 | 40.51% | 1 | 14 | 14 |
| P0A9C0   | Anaerobic gly   | 4.43  | 5.54%  | 1 | 2  | 2  |
| P0A996   | Anaerobic gly   | 9.03  | 11.62% | 1 | 4  | 4  |
| P13035   | Aerobic glycer  | 42.01 | 33.13% | 1 | 13 | 13 |
| C5A093   | Glycerol kinas  | 48.15 | 27.69% | 1 | 10 | 10 |
| P52101   | Sensor histidi  | 1.89  | 1.68%  | 1 | 1  | 1  |
| P0AC69   | Glutaredoxin    | 3.94  | 11.30% | 1 | 1  | 1  |
| C4ZXC6   | Serine hydrox   | 9.75  | 19.90% | 1 | 5  | 5  |
| B1XD84   | Phosphohept     | 9.89  | 18.23% | 1 | 3  | 3  |
| P32662   | Phosphoglyco    | 2.1   | 2.78%  | 1 | 1  | 1  |
| B1XFK5   | Probable pho:   | 4.72  | 8.84%  | 1 | 2  | 2  |
| P25552   | Guanosine-5'-   | 2.02  | 5.47%  | 1 | 2  | 2  |
| P23893   | Glutamate-1-s   | 4.69  | 6.57%  | 1 | 2  | 2  |
| B1XCM1   | Glutamate--cy   | 1.94  | 2.12%  | 1 | 1  | 1  |
| P0AES0   | Bifunctional g  | 3.92  | 4.85%  | 1 | 2  | 2  |
| P0A9D2   | Glutathione S   | 12.06 | 30.35% | 1 | 4  | 4  |
| B1XAY2   | GMP synthase    | 19.73 | 17.90% | 1 | 8  | 8  |
| P0AES4   | DNA gyrase su   | 13.12 | 7.89%  | 1 | 7  | 7  |
| P0AES6   | DNA gyrase su   | 20.74 | 16.04% | 1 | 8  | 8  |
| Q47141   | Hca operon tr   | 2.18  | 4.39%  | 1 | 1  | 1  |
| P15038   | DNA helicase    | 3.04  | 2.19%  | 1 | 1  | 1  |
| P0ACB4   | Protoporphyrin  | 4.42  | 11.60% | 1 | 2  | 2  |
| B1XFR2   | Ferrochelatas   | 3.55  | 2.81%  | 1 | 1  | 1  |
| P32131   | Oxygen-indep    | 2.72  | 3.72%  | 1 | 1  | 1  |
| P0ABC3   | Modulator of    | 13.52 | 16.17% | 1 | 5  | 5  |
| B1XA42   | High frequenc   | 8.52  | 16.90% | 1 | 3  | 3  |
| P0ABC7   | Modulator of    | 12.07 | 8.59%  | 1 | 3  | 3  |
| P25519   | GTPase HflX C   | 25.63 | 30.52% | 1 | 9  | 9  |
| B1X6V6   | ATP phosphor    | 6.08  | 20.40% | 1 | 5  | 5  |
| P06987   | Histidine bios  | 13.51 | 18.03% | 1 | 5  | 5  |
| C4ZSB0   | Histidinol-pho  | 15.62 | 20.79% | 1 | 5  | 5  |
| P07109   | Histidine tran: | 2.88  | 4.67%  | 1 | 1  | 1  |
| P0ACF8   | DNA-binding p   | 2.85  | 10.22% | 1 | 1  | 1  |
| P28631   | DNA polymeri    | 2.35  | 3.29%  | 1 | 1  | 1  |
| P43329   | ATP-dependen    | 1.77  | 1.08%  | 1 | 1  | 1  |
| P52644   | Heat shock pr   | 5.12  | 15.71% | 1 | 2  | 2  |
| B1X748   | 33 kDa chapei   | 22    | 29.11% | 1 | 6  | 6  |
| B1XB97   | ATP-dependen    | 1.86  | 2.03%  | 1 | 1  | 1  |
| P0A6Z3   | Chaperone pr    | 58.71 | 30.77% | 1 | 17 | 17 |
| B1X9B7   | Small heat sh   | 7.22  | 13.87% | 1 | 2  | 2  |
| P08200   | Isocitrate deh  | 10.97 | 13.46% | 1 | 4  | 4  |
| P0A705-3 | Isoform Beta'   | 3.63  | 4.82%  | 3 | 3  | 3  |

|        |                 |       |        |   |    |    |
|--------|-----------------|-------|--------|---|----|----|
| C4ZYI0 | Translation in  | 3.28  | 8.33%  | 1 | 1  | 1  |
| P04968 | L-threonine de  | 5.55  | 4.67%  | 1 | 2  | 2  |
| P08142 | Acetolactate s  | 7.45  | 9.43%  | 1 | 3  | 3  |
| C4ZZ44 | Ketol-acid red  | 6.15  | 5.50%  | 1 | 3  | 3  |
| C4ZZ41 | Dihydroxy-aci   | 4.43  | 4.87%  | 1 | 3  | 3  |
| P0AB80 | Branched-cha    | 2.3   | 3.56%  | 1 | 1  | 1  |
| P0AEW6 | Inosine-guanc   | 2.16  | 1.84%  | 1 | 1  | 1  |
| P0CF93 | Putative trans  | 4.89  | 6.76%  | 1 | 2  | 2  |
| P0AAC8 | Iron-binding p  | 2.26  | 13.08% | 1 | 1  | 1  |
| C4ZXA5 | Cysteine desu   | 10.52 | 15.10% | 1 | 5  | 5  |
| P0AD57 | Octaprenyl di   | 5.33  | 8.36%  | 1 | 2  | 2  |
| P0AEW9 | 1-phosphofru    | 1.9   | 5.77%  | 1 | 1  | 1  |
| B1XBA8 | Catalase-pero   | 2.33  | 6.75%  | 1 | 4  | 4  |
| P76268 | Transcription   | 6.35  | 11.41% | 1 | 3  | 3  |
| P0A717 | Ribose-phospl   | 3.85  | 15.87% | 1 | 4  | 4  |
| P03023 | Lactose opero   | 9.59  | 15.00% | 1 | 5  | 5  |
| B1XC35 | Maltoporin O'   | 5.84  | 10.09% | 1 | 3  | 3  |
| P37005 | Uncharacteriz   | 4.65  | 9.21%  | 1 | 2  | 2  |
| P69451 | Long-chain-fa   | 6.76  | 6.77%  | 1 | 3  | 3  |
| P76008 | Murein tetrap   | 3.47  | 4.28%  | 1 | 1  | 1  |
| P52643 | D-lactate dehy  | 6.55  | 8.81%  | 1 | 2  | 2  |
| B1XB43 | Elongation fac  | 41.4  | 32.05% | 1 | 14 | 14 |
| P00803 | Signal peptida  | 3.7   | 3.09%  | 1 | 1  | 1  |
| P30125 | 3-isopropylma   | 2.24  | 5.79%  | 1 | 2  | 2  |
| C4ZXJ7 | L-lactate dehy  | 12.55 | 18.94% | 1 | 5  | 5  |
| P25894 | Metalloprotea   | 2.76  | 4.76%  | 1 | 1  | 1  |
| P75867 | Putative Lon p  | 15.89 | 13.14% | 1 | 4  | 4  |
| P45464 | Penicillin-bind | 14.51 | 10.32% | 1 | 6  | 6  |
| P0AB38 | Penicillin-bind | 2.11  | 6.57%  | 1 | 1  | 1  |
| P69776 | Major outer n   | 4.34  | 33.33% | 1 | 2  | 2  |
| P36771 | Probable HTH    | 2.51  | 3.85%  | 1 | 1  | 1  |
| P75823 | Low specificity | 3.26  | 4.20%  | 1 | 1  | 1  |
| P68187 | Maltose/malt    | 14.71 | 14.02% | 1 | 4  | 4  |
| B1X764 | HTH-type trar   | 8.99  | 5.44%  | 1 | 5  | 5  |
| P26616 | NAD-depende     | 5.56  | 5.31%  | 1 | 2  | 2  |
| P76558 | NADP-depend     | 26.66 | 22.79% | 1 | 12 | 12 |
| P08997 | Malate syntha   | 2.25  | 3.56%  | 1 | 1  | 1  |
| P0AEY3 | Nucleoside tri  | 3.94  | 9.13%  | 1 | 2  | 2  |
| P0ACE0 | Hydrogenase-    | 8.03  | 15.70% | 1 | 5  | 5  |
| C4ZSX4 | Malate dehyd    | 4.88  | 10.26% | 1 | 3  | 3  |
| P25665 | 5-methyltetra   | 4.63  | 3.98%  | 1 | 2  | 2  |
| P13009 | Methionine sy   | 64.18 | 21.52% | 2 | 21 | 21 |
| P30750 | Methionine in   | 1.97  | 5.25%  | 1 | 1  | 1  |
| P28635 | D-methionine    | 13.95 | 28.04% | 1 | 4  | 4  |
| P30958 | Transcription-  | 18.83 | 10.02% | 1 | 9  | 10 |
| P77569 | DNA-binding t   | 2.45  | 6.50%  | 1 | 1  | 1  |
| B1X656 | tRNA-2-methy    | 8.01  | 11.60% | 1 | 4  | 4  |
| P0AEZ3 | Septum site-d   | 1.78  | 5.19%  | 1 | 1  | 1  |
| P0A908 | MltA-interacti  | 3.09  | 5.24%  | 1 | 1  | 1  |
| P76506 | Probable pho:   | 3.85  | 10.36% | 1 | 3  | 3  |
| P50456 | Protein mlc O   | 4.11  | 7.88%  | 1 | 3  | 3  |

|        |                 |        |        |   |    |    |
|--------|-----------------|--------|--------|---|----|----|
| C4ZZ19 | tRNA uridine    | 4.98   | 3.34%  | 1 | 1  | 1  |
| P12281 | Molybdopteri    | 3.1    | 4.38%  | 1 | 1  | 1  |
| P37773 | UDP-N-acetyl    | 2.58   | 2.41%  | 1 | 1  | 1  |
| P0ACR9 | Transcription   | 4.19   | 9.09%  | 1 | 2  | 2  |
| B1X6C4 | Protein MtfA    | 5.03   | 10.94% | 1 | 2  | 2  |
| P40874 | N-methyl-L-tr   | 2.39   | 3.49%  | 1 | 1  | 1  |
| C4ZQ50 | Chromosome      | 25.64  | 9.76%  | 1 | 13 | 13 |
| P22524 | Chromosome      | 8.71   | 17.95% | 1 | 2  | 2  |
| C4ZQ48 | Chromosome      | 17.64  | 23.64% | 1 | 7  | 7  |
| C4ZSS8 | UDP-N-acetyl    | 3.9    | 5.01%  | 2 | 2  | 2  |
| P22188 | UDP-N-acetyl    | 3.63   | 5.05%  | 1 | 1  | 1  |
| B1XC67 | UDP-N-acetyl    | 1.82   | 3.38%  | 1 | 1  | 1  |
| B1XCR0 | DNA mismatch    | 9.29   | 6.33%  | 1 | 5  | 5  |
| P27278 | Trifunctional   | 1.98   | 2.93%  | 1 | 1  | 1  |
| C4ZU31 | Nucleoid-asso   | 24.2   | 22.69% | 1 | 5  | 5  |
| P0ADA3 | Murein hydro    | 2.34   | 6.86%  | 1 | 2  | 2  |
| P40710 | Lipoprotein N   | 2.32   | 19.07% | 1 | 3  | 3  |
| C4ZSQ4 | Lipoprotein N   | 6.56   | 12.24% | 1 | 3  | 3  |
| B1XCN6 | Anaerobic nit   | 2.45   | 2.18%  | 1 | 1  | 1  |
| P0AFB8 | DNA-binding t   | 1.84   | 2.13%  | 1 | 1  | 1  |
| B1XA44 | Phosphatase I   | 3.02   | 11.11% | 1 | 1  | 1  |
| C4ZUD0 | NADH-quinon     | 14.75  | 16.82% | 1 | 3  | 3  |
| P33599 | NADH-quinon     | 62.46  | 41.95% | 2 | 19 | 19 |
| P31979 | NADH-quinon     | 24.36  | 21.80% | 1 | 9  | 9  |
| P33602 | NADH-quinon     | 30.27  | 15.97% | 1 | 10 | 10 |
| P0AFD6 | NADH-quinon     | 16.17  | 35.56% | 1 | 5  | 5  |
| P0AFF6 | Transcription   | 60.43  | 37.98% | 1 | 16 | 16 |
| B1XHF9 | GTPase Obg C    | 2.5    | 5.90%  | 1 | 1  | 1  |
| P0AFG3 | 2-oxoglutarat   | 58.89  | 32.15% | 1 | 21 | 21 |
| P0AFG6 | Dihydrolipoyl   | 23.53  | 25.19% | 1 | 9  | 9  |
| P0AFG8 | Pyruvate dehy   | 71.2   | 32.13% | 1 | 22 | 22 |
| P06959 | Dihydrolipoyl   | 148.01 | 49.21% | 1 | 26 | 26 |
| P0A910 | Outer membr     | 15.24  | 21.68% | 1 | 5  | 5  |
| P0AA16 | Transcription   | 10.6   | 22.18% | 1 | 4  | 4  |
| P27298 | Oligopeptidas   | 41.45  | 22.21% | 1 | 11 | 11 |
| P76027 | Oligopeptide    | 5.48   | 14.84% | 1 | 3  | 3  |
| P77737 | Oligopeptide    | 15.17  | 24.85% | 1 | 6  | 6  |
| P0ADB1 | Osmotically-ir  | 6.94   | 38.39% | 1 | 3  | 3  |
| P0A9L8 | Pyrrroline-5-ca | 2.02   | 3.35%  | 1 | 1  | 1  |
| P0A912 | Peptidoglycan   | 19.99  | 32.37% | 1 | 4  | 4  |
| B1XCA8 | Pantothenate    | 2.26   | 14.13% | 1 | 2  | 2  |
| P0AFI2 | DNA topoison    | 7.53   | 8.11%  | 1 | 4  | 4  |
| P20083 | DNA topoison    | 16.88  | 14.60% | 1 | 7  | 7  |
| B1X750 | Phosphoenolp    | 1.9    | 5.74%  | 1 | 2  | 2  |
| B1XAZ8 | Peptidase B O   | 3.86   | 5.15%  | 1 | 2  | 2  |
| P15288 | Cytosol non-s   | 26.65  | 21.03% | 1 | 8  | 8  |
| B1XAK9 | Xaa-Pro dipep   | 2.28   | 3.16%  | 1 | 1  | 1  |
| P09373 | Formate acety   | 69.19  | 29.47% | 2 | 16 | 16 |
| P36938 | Phosphogluco    | 3.88   | 6.04%  | 1 | 1  | 3  |
| P0A9J8 | P-protein OS=   | 3.43   | 3.89%  | 1 | 2  | 2  |
| P0A9K3 | PhoH-like pro   | 4.31   | 6.36%  | 1 | 1  | 2  |

|          |                 |       |        |   |    |    |
|----------|-----------------|-------|--------|---|----|----|
| P0A9K7   | Phosphate-sp    | 36.18 | 48.13% | 1 | 9  | 9  |
| P0AC86   | Glycogen pho    | 4.91  | 3.56%  | 1 | 2  | 2  |
| P00490   | Maltodextrin    | 42.2  | 22.58% | 1 | 14 | 14 |
| C4ZSQ5   | Polyribonucle   | 6.34  | 9.70%  | 1 | 5  | 5  |
| P69874   | Spermidine/p    | 4.61  | 6.88%  | 1 | 2  | 2  |
| P23869   | Peptidyl-proly  | 4.26  | 19.51% | 1 | 2  | 2  |
| P0ADY1   | Peptidyl-proly  | 74.58 | 41.25% | 1 | 16 | 16 |
| P0A7B1   | Polyphosphat    | 32.55 | 18.60% | 1 | 11 | 11 |
| P23538   | Phosphoenolp    | 42.64 | 29.29% | 1 | 17 | 17 |
| P0AFL6   | Exopolyphosp    | 8.87  | 10.33% | 1 | 4  | 4  |
| P0A8T1   | Ribosomal prc   | 1.9   | 5.12%  | 1 | 1  | 1  |
| P07004   | Gamma-gluta     | 2.66  | 3.12%  | 1 | 1  | 1  |
| C4ZT99   | Glutamate 5-t   | 9.04  | 10.63% | 1 | 3  | 3  |
| C4ZZI8   | RNA chaperor    | 2.81  | 4.31%  | 1 | 1  | 1  |
| P23830   | CDP-diacylgly   | 3.7   | 5.54%  | 1 | 1  | 1  |
| P37177   | Phosphoenolp    | 12.9  | 11.63% | 1 | 6  | 6  |
| P08839   | Phosphoenolp    | 28.5  | 22.43% | 1 | 11 | 11 |
| P0A9M8   | Phosphate aci   | 11.05 | 8.82%  | 1 | 5  | 5  |
| P69828   | PTS system ga   | 29.88 | 48.67% | 1 | 4  | 4  |
| P37188   | PTS system ga   | 4.21  | 20.21% | 1 | 1  | 1  |
| P0AG16   | Amidophosph     | 24.8  | 18.81% | 1 | 7  | 7  |
| P08179   | Phosphoribos    | 6.86  | 17.45% | 1 | 3  | 3  |
| P15254   | Phosphoribos    | 36.72 | 16.76% | 1 | 15 | 15 |
| B1XAX4   | Phosphoribos    | 2.16  | 4.35%  | 1 | 1  | 1  |
| B1XAE8   | Phosphoribos    | 10.79 | 16.88% | 1 | 4  | 4  |
| P0AB89   | Adenylosuccir   | 9.74  | 9.43%  | 1 | 3  | 3  |
| B1XDS8   | Adenylosuccir   | 15.2  | 22.69% | 1 | 7  | 7  |
| C4ZYC2   | HTH-type trar   | 7.34  | 13.20% | 1 | 3  | 3  |
| P33221   | Formate-depe    | 11.4  | 17.60% | 1 | 4  | 4  |
| P37051   | Formyltetrahy   | 4.31  | 5.36%  | 1 | 1  | 1  |
| P09546   | Bifunctional p  | 34.34 | 16.89% | 1 | 15 | 15 |
| P78061   | Gamma-gluta     | 10.45 | 12.71% | 1 | 5  | 5  |
| P0A7E5   | CTP synthase    | 9.89  | 8.07%  | 1 | 4  | 4  |
| P0AA53   | Protein QmcA    | 7.75  | 17.38% | 1 | 3  | 4  |
| P24554   | DNA repair pr   | 4.61  | 5.87%  | 1 | 3  | 3  |
| C4ZPY3   | RNA polymera    | 38.98 | 21.59% | 1 | 16 | 16 |
| P31473   | ATPase RavA (   | 7.01  | 6.02%  | 1 | 3  | 3  |
| P21893   | Single-strande  | 18.13 | 17.16% | 1 | 8  | 8  |
| P0AG20   | GTP pyrophos    | 6.3   | 5.38%  | 1 | 3  | 3  |
| B1XEH8   | Peptide chain   | 18.48 | 19.73% | 1 | 7  | 7  |
| P0A7I4   | Peptide chain   | 8.04  | 9.07%  | 1 | 2  | 3  |
| C4ZZ48   | ATP-depende     | 4.49  | 11.16% | 1 | 3  | 3  |
| P0AG30   | Transcription   | 9.88  | 14.08% | 1 | 6  | 6  |
| P0AG40   | Bifunctional ri | 3.25  | 7.67%  | 1 | 1  | 1  |
| B1X7X6   | Ribosomal prc   | 8.18  | 10.88% | 1 | 4  | 4  |
| P00452-2 | Isoform Alpha   | 30.53 | 14.81% | 2 | 9  | 9  |
| P69924   | Ribonucleosid   | 19.35 | 25.80% | 1 | 5  | 5  |
| B1XBY7   | 50S ribosoma    | 6.11  | 24.85% | 1 | 3  | 3  |
| C5A0S3   | 50S ribosoma    | 2.18  | 7.04%  | 1 | 1  | 1  |
| P0AA10   | 50S ribosoma    | 2     | 4.93%  | 1 | 1  | 1  |
| C4ZUG5   | 50S ribosoma    | 1.8   | 16.26% | 1 | 1  | 1  |

|        |                 |        |        |   |    |    |
|--------|-----------------|--------|--------|---|----|----|
| P02413 | 50S ribosoma    | 19.34  | 33.33% | 1 | 4  | 4  |
| C4ZUG8 | 50S ribosoma    | 5.73   | 22.06% | 1 | 2  | 2  |
| B1X6E6 | 50S ribosoma    | 7.92   | 20.47% | 1 | 3  | 3  |
| C4ZUF9 | 50S ribosoma    | 1.99   | 7.69%  | 1 | 1  | 1  |
| P0A7K6 | 50S ribosoma    | 1.89   | 6.96%  | 1 | 1  | 1  |
| B1XG23 | 50S ribosoma    | 4.09   | 17.80% | 1 | 2  | 2  |
| B1X6G8 | 50S ribosoma    | 10.55  | 17.22% | 1 | 4  | 4  |
| B1X6F4 | 50S ribosoma    | 1.86   | 13.56% | 1 | 1  | 1  |
| C4ZYH9 | 50S ribosoma    | 2.56   | 20.00% | 1 | 1  | 1  |
| P60723 | 50S ribosoma    | 1.8    | 7.46%  | 1 | 1  | 1  |
| B1X6G0 | 50S ribosoma    | 49.64  | 64.80% | 1 | 12 | 12 |
| B1X6F7 | 50S ribosoma    | 4.11   | 25.99% | 1 | 3  | 3  |
| P0C0R7 | Ribosomal RN    | 2.22   | 4.31%  | 1 | 1  | 1  |
| C4ZQ93 | Ribosomal RN    | 3.38   | 4.04%  | 1 | 1  | 1  |
| P36979 | Dual-specificit | 7.27   | 6.51%  | 1 | 2  | 2  |
| P33643 | Ribosomal lar   | 15.78  | 23.93% | 1 | 4  | 4  |
| C4ZTY2 | Exoribuclea     | 8.24   | 7.61%  | 1 | 4  | 4  |
| P0A7Y0 | Ribonuclease    | 5.5    | 7.52%  | 1 | 2  | 2  |
| P21513 | Ribonuclease    | 157.79 | 38.17% | 1 | 30 | 30 |
| P0CG18 | Ribonuclease    | 5.56   | 11.34% | 2 | 2  | 2  |
| P21499 | Ribonuclease    | 3.85   | 3.44%  | 1 | 2  | 2  |
| P27434 | Cytoskeleton    | 1.89   | 3.86%  | 1 | 1  | 1  |
| P24255 | RNA polymera    | 5.59   | 6.71%  | 1 | 3  | 3  |
| P0ACS7 | HTH-type trar   | 6.87   | 14.19% | 1 | 3  | 3  |
| P0A7Z4 | DNA-directed    | 15.59  | 21.58% | 1 | 6  | 6  |
| C5A0S7 | DNA-directed    | 253.36 | 57.23% | 1 | 60 | 60 |
| B1XBZ0 | DNA-directed    | 71.56  | 27.08% | 1 | 26 | 27 |
| P00579 | RNA polymera    | 36.52  | 18.11% | 1 | 11 | 11 |
| P13445 | RNA polymera    | 9.75   | 14.85% | 1 | 4  | 4  |
| B1XB95 | Regulator of r  | 8.26   | 14.29% | 1 | 3  | 3  |
| C4ZUF2 | 30S ribosoma    | 1.9    | 9.30%  | 1 | 1  | 1  |
| C4ZUJ7 | 30S ribosoma    | 6.82   | 8.87%  | 2 | 2  | 2  |
| P0A7S9 | 30S ribosoma    | 10.13  | 33.05% | 1 | 4  | 4  |
| P0AG59 | 30S ribosoma    | 2.81   | 9.90%  | 1 | 1  | 1  |
| C4ZUG6 | 30S ribosoma    | 1.79   | 9.52%  | 1 | 1  | 1  |
| C4ZR79 | 30S ribosoma    | 7.97   | 40.00% | 1 | 3  | 3  |
| P0AG67 | 30S ribosoma    | 8.71   | 9.87%  | 1 | 4  | 4  |
| C4ZRR1 | 30S ribosoma    | 21.81  | 37.34% | 1 | 6  | 6  |
| P0A7V3 | 30S ribosoma    | 5.3    | 14.59% | 1 | 3  | 3  |
| B1X6E8 | 30S ribosoma    | 15.25  | 26.21% | 1 | 5  | 5  |
| P0A7W1 | 30S ribosoma    | 1.93   | 11.38% | 1 | 1  | 1  |
| C4ZR77 | 30S ribosoma    | 5.34   | 26.72% | 2 | 4  | 4  |
| B1X6F8 | 30S ribosoma    | 1.99   | 6.15%  | 1 | 1  | 1  |
| B1XHK3 | 30S ribosoma    | 3.46   | 26.15% | 1 | 3  | 3  |
| B1X6E1 | Ribosomal RN    | 9.68   | 14.22% | 1 | 4  | 4  |
| P38104 | Starvation-ser  | 1.91   | 2.97%  | 1 | 1  | 1  |
| P52108 | Transcriptiona  | 11.3   | 14.64% | 1 | 4  | 4  |
| P30744 | L-serine dehy   | 2.14   | 1.98%  | 1 | 1  | 1  |
| P10408 | Protein trans   | 17.95  | 7.99%  | 1 | 6  | 6  |
| P0AG86 | Protein-expor   | 10.78  | 28.39% | 1 | 3  | 3  |
| P0A9T0 | D-3-phosphog    | 36.54  | 27.56% | 1 | 10 | 10 |



|         |                 |       |        |   |    |    |
|---------|-----------------|-------|--------|---|----|----|
| P0AGB0  | Phosphoserin    | 6.98  | 18.63% | 1 | 4  | 4  |
| B1X847  | Phosphoserin    | 2.38  | 8.84%  | 1 | 3  | 3  |
| P0AGM5  | UPF0162 prot    | 12.78 | 29.00% | 1 | 5  | 5  |
| P0C093  | Nucleoid occl   | 5.49  | 13.13% | 1 | 2  | 2  |
| P0A905  | Outer membr     | 2.26  | 7.74%  | 1 | 1  | 1  |
| P0AGD3  | Superoxide di   | 3.39  | 7.25%  | 1 | 1  | 1  |
| P21170  | Biosynthetic a  | 5.28  | 4.26%  | 1 | 2  | 2  |
| P0AG24  | Bifunctional (p | 4.05  | 3.56%  | 1 | 3  | 3  |
| P0AGD7  | Signal recogni  | 13.62 | 18.10% | 1 | 5  | 5  |
| P0AFZ3  | Stringent star  | 2.21  | 6.67%  | 1 | 1  | 1  |
| P76072  | Prophage side   | 2.64  | 1.43%  | 1 | 1  | 1  |
| C5A0R1  | Soluble pyridi  | 7.39  | 8.15%  | 1 | 3  | 3  |
| B1X6Q8  | Succinate--Co   | 48.44 | 38.14% | 1 | 11 | 11 |
| P0AGE9  | Succinate--Co   | 15.43 | 26.64% | 1 | 6  | 6  |
| P77522  | FeS cluster as  | 1.81  | 3.23%  | 1 | 1  | 1  |
| P0ADG4  | Inositol-1-moi  | 3.54  | 8.24%  | 1 | 2  | 2  |
| P00957  | Alanine--tRNA   | 67.75 | 39.61% | 1 | 25 | 25 |
| B1XGC4  | Cysteine--tRN   | 7.86  | 11.93% | 1 | 3  | 3  |
| B1XHD4  | Aspartate--tRl  | 16.77 | 16.10% | 1 | 9  | 9  |
| B1X9R9  | Glutamate--tF   | 2.41  | 6.79%  | 1 | 2  | 2  |
| P08312  | Phenylalanine   | 5.78  | 10.70% | 1 | 3  | 3  |
| P07395  | Phenylalanine   | 26.81 | 17.23% | 1 | 8  | 8  |
| C4ZXF0  | Glycine--tRNA   | 5.5   | 9.90%  | 2 | 2  | 2  |
| B1X8H5  | Glycine--tRNA   | 86.63 | 40.20% | 1 | 23 | 23 |
| P60906  | Histidine--tRN  | 20.15 | 22.88% | 1 | 7  | 7  |
| C4ZPV2  | Isoleucine--tR  | 26.66 | 14.71% | 1 | 12 | 12 |
| P0A8N3  | Lysine--tRNA l  | 37.05 | 34.85% | 1 | 10 | 13 |
| P0A8N5  | Lysine--tRNA l  | 41.3  | 33.86% | 1 | 10 | 13 |
| P07813  | Leucine--tRNA   | 30.18 | 20.47% | 1 | 14 | 14 |
| C4ZSJ8  | Methionine--t   | 33.77 | 20.24% | 1 | 9  | 9  |
| P0A8M0  | Asparagine--tl  | 32.08 | 24.25% | 1 | 9  | 9  |
| C4ZWF6  | Glutamine--tR   | 1.81  | 3.07%  | 1 | 2  | 2  |
| B1XHE4  | Arginine--tRN.  | 4.33  | 6.59%  | 1 | 3  | 3  |
| B1X833  | Serine--tRNA l  | 11.43 | 18.60% | 1 | 6  | 6  |
| B1XGI1  | Threonine--tR   | 30.5  | 19.31% | 1 | 11 | 11 |
| P07118  | Valine--tRNA l  | 59.05 | 23.24% | 1 | 19 | 19 |
| P00954  | Tryptophan--t   | 2.42  | 5.09%  | 1 | 1  | 1  |
| P0AGJ9  | Tyrosine--tRN   | 3.58  | 4.48%  | 1 | 2  | 2  |
| P08957  | Type I restrict | 7.02  | 4.91%  | 1 | 2  | 3  |
| P08956  | Type I restrict | 12.71 | 8.12%  | 1 | 7  | 7  |
| P0A870  | Transaldolase   | 44.88 | 58.04% | 2 | 14 | 14 |
| P69428  | Sec-independ    | 3.29  | 14.61% | 1 | 1  | 1  |
| P69425  | Sec-independ    | 2.55  | 14.04% | 1 | 2  | 2  |
| C4Z XK8 | L-threonine 3-  | 5.86  | 7.04%  | 1 | 2  | 2  |
| C4ZTI0  | tRNA sulfurtra  | 4.07  | 8.09%  | 1 | 2  | 3  |
| P31142  | 3-mercaptopy    | 3.64  | 4.27%  | 1 | 1  | 1  |
| B1XFM4  | Trigger factor  | 7.94  | 12.73% | 1 | 4  | 4  |
| P27302  | Transketolase   | 23.7  | 12.37% | 1 | 6  | 6  |
| P19934  | Tol-Pal system  | 2.06  | 6.89%  | 1 | 2  | 2  |
| P18004  | Protein TraC C  | 2.06  | 0.80%  | 1 | 1  | 1  |
| P0AE01  | tRNA (cytidine  | 2.35  | 6.50%  | 1 | 1  | 1  |

|        |                 |       |        |   |    |    |
|--------|-----------------|-------|--------|---|----|----|
| P0A879 | Tryptophan sy   | 1.94  | 3.02%  | 1 | 1  | 1  |
| P07649 | tRNA pseudou    | 5.71  | 14.07% | 1 | 3  | 3  |
| C4ZZP9 | tRNA pseudou    | 4.19  | 6.02%  | 1 | 2  | 2  |
| P32132 | GTP-binding p   | 2.08  | 1.81%  | 1 | 1  | 1  |
| P07023 | T-protein OS=   | 5.22  | 6.17%  | 1 | 2  | 2  |
| P07604 | Transcriptiona  | 4.67  | 4.68%  | 1 | 2  | 2  |
| P0A884 | Thymidylate s   | 7.58  | 14.77% | 1 | 3  | 3  |
| P75728 | 2-octaprenyl-   | 2.75  | 3.32%  | 1 | 1  | 1  |
| P76373 | UDP-glucose (   | 3.58  | 8.25%  | 1 | 3  | 3  |
| P0A8F0 | Uracil phosph   | 2.39  | 8.17%  | 1 | 1  | 1  |
| P0AED0 | Universal stre  | 8.84  | 40.97% | 1 | 2  | 2  |
| P43672 | ABC transport   | 16.65 | 13.07% | 1 | 7  | 7  |
| P0A698 | UvrABC syster   | 7.61  | 8.19%  | 1 | 5  | 5  |
| C4ZXV1 | UvrABC syster   | 31.27 | 22.14% | 1 | 11 | 11 |
| P03018 | DNA helicase    | 1.81  | 1.67%  | 1 | 1  | 1  |
| P39161 | Uxu operon tr   | 2.2   | 3.89%  | 1 | 1  | 1  |
| B1X9X3 | Protein ViaA C  | 3.72  | 3.93%  | 1 | 2  | 2  |
| C4ZZ62 | UDP-N-acetyl-   | 3.76  | 5.28%  | 1 | 1  | 1  |
| P76372 | Chain length c  | 4.46  | 6.44%  | 1 | 2  | 2  |
| B1XAH7 | Tyrosine recoi  | 8.42  | 14.09% | 1 | 4  | 4  |
| P0A8P8 | Tyrosine recoi  | 8.39  | 12.42% | 1 | 3  | 3  |
| Q47147 | Putative gluta  | 2.17  | 3.92%  | 1 | 1  | 1  |
| P0AA99 | Putative L,D-t  | 1.91  | 7.72%  | 1 | 1  | 1  |
| P77169 | Putative unch   | 1.79  | 4.53%  | 1 | 1  | 1  |
| P0ADA5 | Uncharacteriz   | 2.29  | 7.29%  | 1 | 1  | 1  |
| P0ACJ5 | DNA-binding t   | 3.56  | 6.58%  | 1 | 1  | 1  |
| P0AFP4 | Uncharacteriz   | 2.33  | 8.18%  | 1 | 1  | 1  |
| B1X654 | Endoribonuck    | 4.56  | 9.68%  | 1 | 1  | 1  |
| P46130 | Putative acyl-l | 5.14  | 6.09%  | 1 | 2  | 2  |
| C4ZXW7 | UPF0194 men     | 13.03 | 21.99% | 1 | 4  | 4  |
| P30178 | Hydroxycarbo    | 9.55  | 18.28% | 1 | 4  | 4  |
| P0ACU0 | HTH-type trar   | 7.6   | 15.70% | 1 | 3  | 3  |
| P0A9U3 | Uncharacteriz   | 9.54  | 8.87%  | 1 | 4  | 4  |
| P75838 | Ribosomal pro   | 11.85 | 14.85% | 1 | 5  | 5  |
| P75915 | Chaperone pr    | 12.5  | 34.78% | 1 | 5  | 5  |
| P24188 | UPF0176 prot    | 2.51  | 4.00%  | 1 | 1  | 1  |
| P27431 | 50S ribosoma    | 9.27  | 10.46% | 1 | 3  | 3  |
| P0ABU2 | Ribosome-bin    | 3.22  | 6.06%  | 1 | 2  | 2  |
| P0A8Z0 | Acyl-CoA thio   | 6.54  | 29.55% | 1 | 3  | 3  |
| P64451 | Uncharacteriz   | 2.35  | 11.26% | 1 | 1  | 1  |
| P76104 | Uncharacteriz   | 9.19  | 5.82%  | 1 | 4  | 4  |
| P77156 | Inner membra    | 1.81  | 5.11%  | 1 | 1  | 1  |
| P67699 | Uncharacteriz   | 1.81  | 15.96% | 1 | 1  | 1  |
| P77804 | Protein YdgA (  | 24.96 | 28.69% | 1 | 10 | 10 |
| P77748 | Uncharacteriz   | 36.32 | 16.80% | 1 | 14 | 14 |
| P76245 | Diguanylate c   | 11.2  | 20.23% | 1 | 4  | 4  |
| P0A8A0 | Probable tran   | 2.16  | 4.07%  | 1 | 1  | 1  |
| P76403 | Uncharacteriz   | 20.59 | 21.41% | 1 | 6  | 6  |
| P33355 | Uncharacteriz   | 2.73  | 8.97%  | 1 | 1  | 1  |
| P33029 | Uncharacteriz   | 4.11  | 6.15%  | 3 | 3  | 3  |
| P76507 | Uncharacteriz   | 1.81  | 1.81%  | 1 | 1  | 1  |

|        |                 |          |        |   |     |     |
|--------|-----------------|----------|--------|---|-----|-----|
| P76578 | Uncharacteriz   | 2.46     | 0.60%  | 1 | 1   | 1   |
| P33634 | Uncharacteriz   | 2.03     | 3.75%  | 1 | 1   | 1   |
| P0ADR8 | Pyrimidine/pu   | 37.14    | 32.38% | 1 | 11  | 11  |
| P65294 | Uncharacteriz   | 2.13     | 12.50% | 1 | 1   | 1   |
| P64574 | Uncharacteriz   | 2.07     | 12.63% | 1 | 1   | 1   |
| P0ADT5 | Putative acid-  | 2.27     | 2.33%  | 1 | 1   | 1   |
| P30871 | Inorganic tripl | 6.22     | 4.39%  | 1 | 2   | 2   |
| P0A894 | RNase adapte    | 6.65     | 11.27% | 1 | 2   | 2   |
| P0ADV5 | Luciferase-like | 2.24     | 8.06%  | 1 | 2   | 2   |
| P0ADW3 | Inner membra    | 9        | 15.91% | 1 | 2   | 2   |
| P64624 | Uncharacteriz   | 10.05    | 17.92% | 1 | 2   | 3   |
| P63389 | Uncharacteriz   | 6.01     | 5.02%  | 1 | 2   | 2   |
| P46837 | Protein YhgF (  | 17.98    | 13.58% | 1 | 7   | 7   |
| P37627 | Uncharacteriz   | 1.96     | 1.85%  | 1 | 1   | 1   |
| P0ADK0 | Uncharacteriz   | 16.45    | 20.76% | 1 | 4   | 4   |
| P11290 | Uncharacteriz   | 4.96     | 6.40%  | 1 | 2   | 2   |
| C4ZYY3 | Membrane pr     | 2.94     | 5.11%  | 1 | 1   | 1   |
| P31475 | Uncharacteriz   | 3.78     | 9.13%  | 1 | 1   | 1   |
| P23305 | Uncharacteriz   | 7.86     | 25.53% | 1 | 4   | 4   |
| B1XAM2 | Der GTPase-ai   | 6.98     | 17.75% | 1 | 3   | 3   |
| P0A8Y3 | Alpha-D-glucc   | 5.77     | 7.04%  | 1 | 1   | 1   |
| P0ADQ2 | Uncharacteriz   | 2.89     | 4.56%  | 1 | 1   | 1   |
| P32680 | Uncharacteriz   | 7.68     | 19.39% | 1 | 3   | 3   |
| P0ACU7 | HTH-type trar   | 6.84     | 26.18% | 1 | 4   | 4   |
| P0AF70 | Uncharacteriz   | 6.48     | 30.77% | 1 | 2   | 2   |
| P24203 | P-loop guanos   | 2.5      | 3.14%  | 1 | 1   | 1   |
| P0A8Y1 | Pyrimidine 5'-  | 2.74     | 6.22%  | 1 | 1   | 1   |
| P0A9W3 | Energy-depen    | 11.22    | 11.35% | 1 | 4   | 4   |
| P64429 | Uncharacteriz   | 3.73     | 8.36%  | 1 | 2   | 2   |
| Q46939 | Probable acet   | 5.96     | 10.94% | 1 | 3   | 3   |
| Q46855 | Uncharacteriz   | 1.86     | 3.46%  | 1 | 1   | 1   |
| P64596 | Uncharacteriz   | 13.09    | 33.51% | 1 | 5   | 5   |
| P0A9W9 | Protein YrdA (  | 4.27     | 11.96% | 1 | 2   | 2   |
| Q9JMS5 | Uncharacteriz   | 1.87     | 0.74%  | 1 | 1   | 1   |
| P36680 | Cell division p | 7.56     | 14.98% | 1 | 3   | 3   |
| C4ZV90 | Zinc transport  | 3.63     | 11.93% | 1 | 3   | 3   |
| P0ACS5 | HTH-type trar   | 3.87     | 13.48% | 1 | 2   | 2   |
| P00761 | Trypsin OS=Su   | 34.51    | 31.17% | 1 | 5   | 5   |
| P0DKX7 | Bifunctional h  | 11218.47 | 85.17% | 1 | 138 | 138 |
| P11553 | L-fuculokinase  | 28.8     | 28.18% | 1 | 10  | 10  |
| P06720 | Alpha-galacto   | 0        | 2.44%  | 1 | 1   | 1   |
| P0AE12 | AMP nucleosi    | 0        | 2.27%  | 1 | 1   | 1   |
| P69503 | Adenine phos    | 2.18     | 7.65%  | 1 | 1   | 1   |
| P24240 | 6-phospho-be    | 1.73     | 6.54%  | 1 | 2   | 2   |
| P0AE37 | Arginine N-su   | 0        | 5.52%  | 1 | 1   | 1   |
| B1XGK5 | Succinylglutar  | 0        | 3.42%  | 1 | 1   | 1   |
| P68699 | ATP synthase    | 1.61     | 20.25% | 1 | 2   | 2   |
| P30847 | Signal transdu  | 1.61     | 3.64%  | 1 | 1   | 1   |
| P37652 | Cyclic di-GMP   | 0        | 3.85%  | 1 | 1   | 2   |
| P17445 | NAD/NADP-de     | 3.26     | 3.27%  | 1 | 1   | 2   |
| P05804 | Beta-glucuron   | 1.65     | 1.33%  | 1 | 1   | 1   |

|        |                 |      |        |   |   |   |
|--------|-----------------|------|--------|---|---|---|
| B1X7A5 | Biotin synthas  | 1.63 | 5.49%  | 1 | 1 | 1 |
| P33927 | Cytochrome c    | 1.62 | 2.47%  | 1 | 1 | 1 |
| P39163 | Glutathione-s   | 0    | 3.90%  | 1 | 1 | 1 |
| P0A6G7 | ATP-depende     | 2.16 | 8.70%  | 1 | 1 | 1 |
| P0AE78 | Magnesium ai    | 1.67 | 4.45%  | 1 | 1 | 1 |
| P0AE82 | Sensor histidi  | 3.67 | 6.35%  | 1 | 1 | 2 |
| B1XDY3 | Sigma factor-l  | 1.63 | 6.77%  | 1 | 1 | 1 |
| P00936 | Adenylate cyc   | 3.38 | 2.83%  | 1 | 2 | 2 |
| P0AEB0 | Sulfate transp  | 3.32 | 2.41%  | 1 | 1 | 1 |
| P29680 | Uroporphyrin    | 5.47 | 12.71% | 1 | 3 | 3 |
| B1XFJ3 | Phosphopent     | 0    | 4.91%  | 1 | 1 | 1 |
| P31460 | Galactonate o   | 2.22 | 10.04% | 1 | 1 | 1 |
| P76015 | PEP-depende     | 0    | 4.49%  | 1 | 1 | 1 |
| P69853 | Tat proofread   | 1.67 | 6.37%  | 1 | 1 | 1 |
| C4ZPU1 | Chaperone pr    | 0    | 2.66%  | 2 | 1 | 1 |
| P06710 | DNA polymer     | 6.77 | 7.62%  | 2 | 4 | 4 |
| B1X7E2 | DNA protectic   | 0    | 5.39%  | 1 | 1 | 1 |
| P0AB83 | Endonuclease    | 1.73 | 5.21%  | 1 | 1 | 1 |
| P37690 | Murein hydro    | 0    | 5.01%  | 1 | 1 | 1 |
| B1XD26 | Iron-sulfur clu | 1.68 | 10.53% | 1 | 1 | 1 |
| P0ACZ4 | DNA-binding t   | 0    | 6.86%  | 1 | 1 | 1 |
| P21151 | 3-ketoacyl-Co   | 0    | 4.13%  | 1 | 1 | 1 |
| B1XFC2 | Probable Fe(2   | 1.75 | 17.58% | 1 | 1 | 1 |
| P0AEN1 | NAD(P)H-flavi   | 1.65 | 12.02% | 1 | 2 | 2 |
| P46889 | DNA transloc    | 0    | 1.13%  | 1 | 1 | 1 |
| P09148 | Galactose-1-p   | 0    | 3.16%  | 1 | 1 | 1 |
| P0A9I3 | Glycine cleav   | 2.28 | 6.84%  | 1 | 1 | 1 |
| Q46839 | Glycolate perr  | 0    | 2.86%  | 1 | 1 | 1 |
| P27249 | Bifunctional u  | 2.08 | 1.57%  | 1 | 1 | 1 |
| P09394 | Glycerophosp    | 1.64 | 3.07%  | 1 | 1 | 1 |
| P75796 | Glutathione ir  | 0    | 1.61%  | 1 | 1 | 1 |
| P09126 | Uroporphyrin    | 0    | 2.85%  | 1 | 1 | 1 |
| P09127 | Protein HemX    | 1.66 | 5.34%  | 1 | 2 | 2 |
| P23873 | Antitoxin HipE  | 0    | 13.64% | 1 | 1 | 1 |
| P0CF55 | Transposase I   | 0    | 3.32%  | 2 | 1 | 1 |
| P39347 | Putative prote  | 0    | 3.28%  | 1 | 1 | 1 |
| P24218 | Prophage inte   | 0    | 3.62%  | 1 | 1 | 1 |
| P75969 | Prophage inte   | 2.25 | 4.27%  | 1 | 1 | 1 |
| P76056 | Prophage inte   | 1.61 | 2.43%  | 1 | 1 | 1 |
| B1XB82 | ATP-depende     | 1.63 | 2.81%  | 1 | 1 | 1 |
| P0AB77 | 2-amino-3-ke    | 1.66 | 6.78%  | 1 | 2 | 2 |
| C4ZTQ6 | 2-dehydro-3-c   | 1.61 | 3.52%  | 1 | 1 | 1 |
| P0AEX5 | Probable pho:   | 1.68 | 2.42%  | 1 | 1 | 1 |
| C4ZPZ5 | 3-isopropylm    | 2.19 | 4.08%  | 1 | 1 | 1 |
| P30015 | Probable ATP-   | 1.61 | 0.59%  | 1 | 1 | 1 |
| C4ZTQ0 | Outer-membr     | 3.28 | 11.59% | 1 | 1 | 2 |
| P0A9V1 | Lipopolysacch   | 1.62 | 4.98%  | 1 | 1 | 1 |
| C4ZWC8 | LPS-assembly    | 0    | 13.99% | 1 | 2 | 2 |
| P21645 | UDP-3-O-(3-h    | 2.22 | 4.11%  | 1 | 1 | 1 |
| P15977 | 4-alpha-glucal  | 5.18 | 6.20%  | 1 | 4 | 4 |
| P24174 | Mannose-1-pl    | 0    | 2.51%  | 1 | 1 | 1 |

|        |                          |      |        |   |   |   |
|--------|--------------------------|------|--------|---|---|---|
| P37330 | Malate synthase          | 0    | 1.24%  | 1 | 1 | 1 |
| P15005 | 5-methylcytosine         | 0    | 1.96%  | 1 | 1 | 1 |
| P37637 | Multidrug resistance     | 1.64 | 1.64%  | 1 | 1 | 1 |
| P0A935 | Membrane-binding         | 2.19 | 2.74%  | 1 | 1 | 1 |
| P0A9X4 | Rod shape-determining    | 0    | 4.32%  | 1 | 1 | 1 |
| P60752 | Lipid A export           | 2.06 | 3.09%  | 1 | 1 | 1 |
| P10902 | L-aspartate oxidase      | 0    | 2.78%  | 1 | 1 | 1 |
| B1X8A2 | Periplasmic nitrate      | 0    | 1.69%  | 1 | 1 | 1 |
| P38489 | Oxygen-insensitive       | 1.71 | 5.07%  | 1 | 1 | 1 |
| P08201 | Nitrite reductase        | 1.77 | 3.78%  | 1 | 1 | 2 |
| P31061 | Prophage DNA             | 2.14 | 11.64% | 1 | 1 | 1 |
| P37596 | Nitric oxide reductase   | 0    | 4.51%  | 1 | 1 | 1 |
| P0AFD1 | NADH-quinone             | 1.67 | 4.82%  | 1 | 1 | 1 |
| C4ZRY9 | Glucans biosynthesis     | 0    | 2.54%  | 1 | 1 | 1 |
| P0COL2 | Peroxiredoxin            | 1.71 | 7.69%  | 1 | 1 | 1 |
| P31677 | Trehalose-6-phosphate    | 1.63 | 2.11%  | 1 | 1 | 1 |
| P28305 | Aminodeoxycholic acid    | 0    | 6.32%  | 1 | 1 | 1 |
| P0AFI5 | D-alanyl-D-alanine       | 3.81 | 13.55% | 1 | 2 | 2 |
| C4ZVL3 | Erythronate-4-phosphate  | 0    | 3.17%  | 1 | 1 | 1 |
| P00914 | Deoxyribodiphosphate     | 1.75 | 2.54%  | 1 | 1 | 1 |
| P0COL7 | Proline/betaine          | 1.74 | 2.20%  | 1 | 1 | 1 |
| C5A1F4 | Phosphatidylserine       | 2.13 | 3.42%  | 1 | 1 | 1 |
| P37344 | Psp operon transcription | 0    | 3.69%  | 1 | 1 | 1 |
| C4ZYG5 | Phosphoenolpyruvate      | 0    | 9.39%  | 1 | 2 | 2 |
| P32676 | PTS system fructose      | 0    | 14.16% | 1 | 1 | 1 |
| P77439 | Multiphosphorylation     | 1.7  | 2.05%  | 1 | 1 | 1 |
| P23883 | NADP/NAD-dependent       | 2.04 | 2.42%  | 1 | 1 | 1 |
| B1XEZ3 | S-adenosylmethionine     | 2.13 | 5.62%  | 1 | 1 | 1 |
| P03856 | Replication initiation   | 1.61 | 3.59%  | 1 | 1 | 1 |
| P0A7I0 | Peptide chain elongation | 1.64 | 1.94%  | 1 | 1 | 1 |
| P25741 | Lipopolysaccharide       | 0    | 5.66%  | 1 | 1 | 1 |
| C4ZWD8 | Pyrimidine-synthesis     | 3.36 | 7.40%  | 1 | 2 | 2 |
| P0A7L0 | 50S ribosome             | 0    | 5.56%  | 1 | 1 | 1 |
| B1XBA2 | 50S ribosome             | 0    | 10.00% | 1 | 1 | 1 |
| B1X6H1 | 50S ribosome             | 0    | 3.83%  | 1 | 1 | 1 |
| P10100 | Endolytic peptidase      | 2.11 | 3.04%  | 1 | 1 | 1 |
| P0A9J0 | Ribonuclease             | 1.67 | 3.07%  | 1 | 1 | 1 |
| P0ACI0 | Right origin-binding     | 0    | 3.46%  | 1 | 1 | 1 |
| P0AGB3 | RNA polymerase           | 1.67 | 2.46%  | 1 | 1 | 1 |
| C4ZSQ6 | 30S ribosome             | 1.74 | 7.87%  | 1 | 1 | 1 |
| B1XG70 | 30S ribosome             | 0    | 11.27% | 1 | 1 | 1 |
| P16456 | Selenide, water          | 1.73 | 3.75%  | 1 | 1 | 1 |
| B1XFT8 | tRNA 2-selenocysteine    | 0    | 1.92%  | 1 | 1 | 1 |
| P39365 | Putative permittivity    | 0    | 2.06%  | 1 | 1 | 1 |
| P39364 | Putative sigma factor    | 0    | 4.85%  | 1 | 1 | 1 |
| P0A9E2 | Regulatory protein       | 2.45 | 15.89% | 1 | 1 | 2 |
| C4ZRL3 | S-adenosylmethionine     | 1.61 | 5.68%  | 1 | 1 | 1 |
| P0AGE0 | Single-strand binding    | 1.74 | 5.62%  | 1 | 1 | 1 |
| C4ZYN7 | SsrA-binding protein     | 1.7  | 5.00%  | 1 | 1 | 1 |
| P0ABZ6 | Chaperone Surfactant     | 0    | 3.27%  | 1 | 1 | 1 |
| B1XD64 | Proline--tRNA            | 2.16 | 4.55%  | 1 | 2 | 2 |

|        |                |      |        |   |   |   |
|--------|----------------|------|--------|---|---|---|
| C5A0T1 | Thiazole synt  | 1.73 | 4.30%  | 1 | 1 | 1 |
| P0AGG0 | Thiamine-mor   | 1.66 | 4.31%  | 1 | 1 | 1 |
| P00934 | Threonine syr  | 2.1  | 2.34%  | 1 | 1 | 1 |
| Q00042 | Putative trans | 2.11 | 3.15%  | 1 | 1 | 1 |
| P06612 | DNA topoison   | 3.38 | 2.08%  | 1 | 2 | 2 |
| P38683 | Periplasmic pi | 2.02 | 4.68%  | 1 | 1 | 1 |
| P41067 | Protein TraB C | 0    | 4.42%  | 1 | 1 | 1 |
| P14497 | Protein TraF C | 1.68 | 4.45%  | 1 | 1 | 1 |
| B1XAN8 | Periplasmic tr | 0    | 1.95%  | 1 | 1 | 1 |
| P60340 | tRNA pseudou   | 0    | 3.50%  | 1 | 1 | 1 |
| P0AA41 | tRNA pseudou   | 0    | 5.00%  | 1 | 1 | 1 |
| P0AAB4 | 3-octaprenyl-  | 0    | 1.61%  | 1 | 1 | 1 |
| P04152 | Protein UmuC   | 1.63 | 3.08%  | 1 | 1 | 1 |
| P0A8F4 | Uridine kinase | 0    | 4.69%  | 1 | 1 | 1 |
| P0AAC0 | Universal stre | 1.73 | 2.85%  | 1 | 1 | 1 |
| P37751 | Putative glyco | 1.69 | 2.96%  | 1 | 1 | 1 |
| P27828 | UDP-N-acetyl   | 1.69 | 1.86%  | 1 | 1 | 1 |
| P39220 | Putative unch  | 2.03 | 7.87%  | 1 | 1 | 1 |
| P37056 | Probable lipof | 0    | 5.47%  | 1 | 1 | 1 |
| P0AA97 | Uncharacteriz  | 0    | 3.87%  | 1 | 1 | 1 |
| P30864 | Uncharacteriz  | 1.7  | 3.29%  | 1 | 1 | 1 |
| B1XD73 | UPF0294 prot   | 0    | 3.38%  | 1 | 1 | 1 |
| P77393 | Uncharacteriz  | 1.66 | 7.75%  | 1 | 2 | 2 |
| P77216 | Uncharacteriz  | 1.72 | 2.46%  | 1 | 1 | 1 |
| P0AAV4 | Uncharacteriz  | 1.73 | 5.50%  | 1 | 1 | 1 |
| P75764 | Uncharacteriz  | 2.02 | 1.46%  | 1 | 1 | 1 |
| P75783 | Moderate cor   | 0    | 1.62%  | 1 | 1 | 1 |
| C4ZY19 | Putative trans | 2.15 | 3.21%  | 1 | 1 | 1 |
| P0AAY6 | Uncharacteriz  | 1.62 | 7.59%  | 1 | 1 | 1 |
| P75818 | Uncharacteriz  | 1.63 | 6.43%  | 1 | 1 | 1 |
| P75821 | Uncharacteriz  | 0    | 4.45%  | 1 | 1 | 1 |
| P75829 | Uncharacteriz  | 1.73 | 3.33%  | 1 | 1 | 1 |
| P22525 | Probable L,D-i | 0    | 3.09%  | 1 | 1 | 1 |
| P77552 | Uncharacteriz  | 1.69 | 1.91%  | 1 | 1 | 1 |
| P76393 | Uncharacteriz  | 1.68 | 1.85%  | 1 | 1 | 1 |
| P76418 | Uncharacteriz  | 0    | 5.69%  | 1 | 1 | 1 |
| P33341 | Outer membr    | 0    | 2.30%  | 1 | 2 | 2 |
| P33342 | Probable fimb  | 0    | 4.18%  | 1 | 1 | 1 |
| C4ZVI4 | 5'-deoxynucle  | 0    | 4.52%  | 1 | 1 | 1 |
| P76573 | Uncharacteriz  | 0    | 5.03%  | 1 | 1 | 1 |
| P0AD44 | Uncharacteriz  | 1.7  | 5.49%  | 1 | 1 | 1 |
| P52124 | Uncharacteriz  | 0    | 3.62%  | 1 | 1 | 1 |
| P0ADE6 | Uncharacteriz  | 0    | 8.05%  | 1 | 1 | 1 |
| Q46908 | Putative elect | 2.18 | 6.56%  | 1 | 1 | 1 |
| P0AGF2 | Sulfur accepto | 1.63 | 4.76%  | 1 | 1 | 1 |
| Q46820 | Uncharacteriz  | 0    | 1.72%  | 1 | 1 | 1 |
| P42640 | Putative phos  | 0    | 3.70%  | 1 | 1 | 1 |
| P37624 | Ribosome-ass   | 2.02 | 1.98%  | 1 | 1 | 1 |
| P0ADN2 | UPF0438 prot   | 1.62 | 14.29% | 1 | 1 | 1 |
| P0ADP2 | Uncharacteriz  | 1.72 | 6.45%  | 1 | 1 | 1 |
| P0ADP7 | Ubiquinone bi  | 0    | 3.98%  | 1 | 1 | 1 |

|        |                |      |        |   |   |   |
|--------|----------------|------|--------|---|---|---|
| P0A9V8 | 3-sulfolactald | 1.61 | 3.69%  | 1 | 1 | 1 |
| P68206 | UPF0337 prot   | 2.02 | 17.39% | 1 | 1 | 1 |
| P39336 | Uncharacteriz  | 2    | 1.99%  | 1 | 1 | 1 |
| P39359 | Probable 2-de  | 1.6  | 2.99%  | 1 | 1 | 1 |
| P39367 | Uncharacteriz  | 0    | 6.05%  | 1 | 1 | 1 |
| P39368 | Uncharacteriz  | 2.27 | 12.71% | 1 | 1 | 1 |
| P76146 | UPF0187 prot   | 3.37 | 3.95%  | 1 | 1 | 1 |
| P76173 | Anaerobic din  | 2.15 | 5.63%  | 1 | 1 | 1 |
| P76280 | Uncharacteriz  | 0    | 10.09% | 1 | 1 | 1 |
| P76559 | Uncharacteriz  | 1.71 | 6.63%  | 1 | 1 | 1 |

| # PSMs | # AAs | MW [kDa] | calc. pI |
|--------|-------|----------|----------|
| 22     | 468   | 51.4     | 5.15     |
| 10     | 396   | 43.5     | 5.77     |
| 2      | 319   | 35.2     | 6.04     |
| 2      | 449   | 49.3     | 7.11     |
| 8      | 304   | 33.3     | 7.68     |
| 1      | 434   | 47.5     | 5.31     |
| 1      | 1520  | 167.1    | 5.03     |
| 2      | 400   | 43.3     | 6.28     |
| 5      | 891   | 97.6     | 5.88     |
| 15     | 865   | 93.4     | 5.4      |
| 1      | 193   | 22.9     | 6.34     |
| 2      | 78    | 8.6      | 4.06     |
| 12     | 397   | 42.2     | 7.99     |
| 6      | 215   | 24.8     | 5.88     |
| 7      | 652   | 72       | 5.8      |
| 12     | 891   | 96.1     | 6.79     |
| 5      | 187   | 20.7     | 5.17     |
| 12     | 820   | 89.1     | 5.68     |
| 4      | 810   | 88.8     | 5.59     |
| 1      | 405   | 45.5     | 6.25     |
| 3      | 412   | 46.2     | 7.87     |
| 3      | 479   | 52.2     | 5.15     |
| 4      | 359   | 39.1     | 5.86     |
| 2      | 503   | 54.8     | 7.23     |
| 14     | 870   | 98.9     | 5.31     |
| 2      | 441   | 49.8     | 5.39     |
| 3      | 292   | 33.4     | 6.95     |
| 1      | 443   | 49.2     | 6.54     |
| 1      | 257   | 27       | 5.62     |
| 3      | 383   | 42.3     | 5.9      |
| 2      | 156   | 17       | 5.03     |
| 8      | 457   | 50.3     | 5.27     |
| 26     | 660   | 74.2     | 6.87     |
| 8      | 379   | 41.6     | 6.89     |
| 3      | 322   | 36.3     | 7.3      |
| 6      | 296   | 33.1     | 7.58     |
| 1      | 362   | 38.9     | 6.05     |
| 1      | 554   | 62.6     | 5.87     |
| 4      | 152   | 16.9     | 6.79     |
| 8      | 478   | 52.3     | 5.29     |
| 2      | 447   | 49.3     | 6.13     |
| 1      | 492   | 53       | 6.01     |
| 2      | 186   | 21.9     | 6.68     |
| 10     | 513   | 55.2     | 6.13     |
| 17     | 460   | 50.3     | 5.01     |
| 1      | 177   | 19.3     | 5.02     |
| 6      | 156   | 17.3     | 6.24     |
| 1      | 287   | 31.6     | 8.76     |
| 1      | 417   | 46.7     | 5.96     |
| 10     | 392   | 41.9     | 4.91     |



|    |      |       |      |
|----|------|-------|------|
| 10 | 344  | 36.8  | 5.57 |
| 8  | 245  | 27.8  | 6.6  |
| 1  | 222  | 25    | 6.01 |
| 2  | 363  | 41    | 6.4  |
| 1  | 523  | 59.4  | 6.6  |
| 24 | 1024 | 116.4 | 5.5  |
| 2  | 479  | 55.3  | 5.86 |
| 3  | 220  | 25.1  | 6.65 |
| 17 | 883  | 99    | 5.68 |
| 2  | 382  | 41.4  | 6.38 |
| 22 | 1073 | 117.8 | 5.34 |
| 1  | 753  | 84.1  | 5.88 |
| 9  | 382  | 43.9  | 6.05 |
| 15 | 548  | 57.3  | 4.94 |
| 1  | 400  | 44.2  | 5.68 |
| 38 | 427  | 48    | 6.68 |
| 1  | 758  | 84.2  | 6.32 |
| 12 | 857  | 95.5  | 5.52 |
| 3  | 424  | 46.3  | 5.35 |
| 1  | 323  | 37    | 6.61 |
| 2  | 316  | 36.6  | 4.73 |
| 7  | 334  | 38    | 6.96 |
| 9  | 210  | 23.6  | 8.25 |
| 3  | 1047 | 114.6 | 6.48 |
| 2  | 365  | 41    | 7.5  |
| 7  | 324  | 36.1  | 7.42 |
| 1  | 201  | 22.3  | 6.37 |
| 6  | 273  | 29.3  | 6.52 |
| 3  | 570  | 64    | 7.64 |
| 3  | 323  | 34.5  | 6.06 |
| 6  | 475  | 52.5  | 5.14 |
| 5  | 403  | 44.4  | 8.28 |
| 6  | 432  | 47.6  | 6.62 |
| 3  | 428  | 46.1  | 5.81 |
| 2  | 273  | 28.7  | 5.76 |
| 1  | 274  | 29.9  | 5.74 |
| 4  | 375  | 41.2  | 5.52 |
| 3  | 193  | 21.2  | 5.91 |
| 5  | 681  | 77.5  | 5.74 |
| 6  | 185  | 19.8  | 5.33 |
| 1  | 629  | 70.5  | 8.72 |
| 16 | 490  | 55    | 5.85 |
| 2  | 472  | 51.4  | 4.73 |
| 5  | 367  | 40    | 5.58 |
| 8  | 447  | 48.6  | 6.4  |
| 1  | 434  | 47.3  | 8.85 |
| 13 | 588  | 64.4  | 6.27 |
| 9  | 238  | 26.8  | 6.73 |
| 1  | 716  | 81.4  | 7.71 |
| 8  | 474  | 50.7  | 6.15 |
| 5  | 571  | 64.6  | 6.67 |

|    |      |       |      |
|----|------|-------|------|
| 2  | 271  | 29.4  | 5.96 |
| 8  | 467  | 52.5  | 8.66 |
| 24 | 638  | 69.1  | 4.97 |
| 2  | 928  | 103.1 | 5.58 |
| 8  | 1160 | 129.8 | 5.31 |
| 2  | 327  | 35.8  | 6.62 |
| 1  | 620  | 67.6  | 6.62 |
| 1  | 48   | 4.8   | 8.21 |
| 4  | 423  | 46.7  | 6.92 |
| 22 | 704  | 77.5  | 5.38 |
| 1  | 283  | 30.4  | 5.29 |
| 29 | 394  | 43.3  | 5.45 |
| 6  | 450  | 50.3  | 6.81 |
| 1  | 342  | 38.7  | 6.6  |
| 2  | 258  | 29.8  | 5.63 |
| 2  | 332  | 36.8  | 5.99 |
| 6  | 172  | 19    | 6.57 |
| 1  | 406  | 42.6  | 5.54 |
| 1  | 413  | 43    | 6.09 |
| 1  | 244  | 25.5  | 7.42 |
| 1  | 317  | 33.5  | 5.25 |
| 4  | 262  | 27.8  | 5.87 |
| 1  | 215  | 24.4  | 9.35 |
| 1  | 151  | 17    | 7.39 |
| 1  | 446  | 48.5  | 5.3  |
| 2  | 239  | 27    | 7.02 |
| 4  | 309  | 34.7  | 5.12 |
| 17 | 1016 | 112.5 | 7.28 |
| 5  | 300  | 33.1  | 5.33 |
| 1  | 260  | 27.7  | 4.81 |
| 1  | 192  | 21.6  | 8.12 |
| 4  | 288  | 31    | 6.09 |
| 6  | 414  | 47    | 6.95 |
| 1  | 167  | 18.9  | 5.31 |
| 2  | 420  | 45.3  | 6.24 |
| 1  | 103  | 11.6  | 7.25 |
| 6  | 644  | 70.7  | 6.24 |
| 10 | 497  | 54.5  | 4.5  |
| 6  | 591  | 64.9  | 5.9  |
| 1  | 382  | 40.5  | 5.27 |
| 8  | 548  | 60.3  | 6.55 |
| 1  | 467  | 50.5  | 6.58 |
| 3  | 331  | 35.5  | 7.11 |
| 9  | 491  | 55.7  | 5.76 |
| 6  | 549  | 61.5  | 6.29 |
| 2  | 482  | 51.7  | 5.6  |
| 3  | 426  | 45.7  | 6.16 |
| 8  | 346  | 37.4  | 6.38 |
| 6  | 284  | 30.8  | 6.34 |
| 26 | 420  | 47.1  | 5.77 |
| 3  | 222  | 24.8  | 7.33 |

|    |      |       |      |
|----|------|-------|------|
| 19 | 957  | 104.3 | 6    |
| 3  | 312  | 35.3  | 6.8  |
| 4  | 477  | 52.8  | 6.62 |
| 5  | 728  | 84.3  | 6.37 |
| 7  | 431  | 48.7  | 6.14 |
| 1  | 657  | 73.5  | 6.06 |
| 3  | 321  | 34.7  | 6.52 |
| 3  | 445  | 47.5  | 6.02 |
| 16 | 609  | 66.9  | 5.87 |
| 16 | 469  | 51.9  | 5.47 |
| 2  | 542  | 58.9  | 6.64 |
| 4  | 396  | 44.1  | 8.43 |
| 16 | 501  | 56.7  | 7.44 |
| 17 | 502  | 56.2  | 5.5  |
| 1  | 475  | 53.3  | 7.78 |
| 1  | 115  | 12.9  | 4.75 |
| 5  | 417  | 45.3  | 6.48 |
| 3  | 192  | 20.8  | 6.42 |
| 1  | 252  | 27.4  | 4.72 |
| 3  | 215  | 24.1  | 5.66 |
| 2  | 494  | 54.8  | 6.37 |
| 2  | 426  | 45.3  | 4.84 |
| 1  | 518  | 58.2  | 5.39 |
| 2  | 619  | 70.5  | 5.29 |
| 4  | 201  | 22.9  | 6.21 |
| 8  | 525  | 58.6  | 5.39 |
| 8  | 875  | 96.9  | 5.2  |
| 10 | 804  | 89.9  | 6.06 |
| 1  | 296  | 32.8  | 6.42 |
| 1  | 684  | 77.9  | 8.27 |
| 2  | 181  | 21.2  | 9.67 |
| 2  | 320  | 35.9  | 6.65 |
| 1  | 457  | 52.7  | 6.06 |
| 6  | 334  | 37.6  | 6.68 |
| 3  | 213  | 22.9  | 9.25 |
| 5  | 419  | 45.5  | 6.43 |
| 11 | 426  | 48.3  | 5.99 |
| 5  | 299  | 33.3  | 5.63 |
| 7  | 355  | 40.3  | 6.18 |
| 5  | 356  | 39.3  | 5.08 |
| 1  | 257  | 28.6  | 8.16 |
| 1  | 137  | 15.5  | 5.47 |
| 1  | 334  | 36.9  | 7.05 |
| 1  | 1300 | 148.9 | 7.9  |
| 2  | 140  | 15.2  | 7.24 |
| 10 | 292  | 32.5  | 4.49 |
| 1  | 443  | 49.6  | 5.35 |
| 19 | 624  | 71.4  | 5.21 |
| 3  | 137  | 15.8  | 5.83 |
| 5  | 416  | 45.7  | 5.26 |
| 3  | 726  | 78.9  | 5.87 |

|    |      |       |      |
|----|------|-------|------|
| 1  | 180  | 20.6  | 9.52 |
| 2  | 514  | 56.2  | 5.88 |
| 3  | 562  | 60.4  | 5.5  |
| 3  | 491  | 54    | 5.31 |
| 3  | 616  | 65.5  | 5.9  |
| 1  | 309  | 34.1  | 5.82 |
| 1  | 434  | 48.4  | 5.78 |
| 2  | 370  | 40.9  | 8.53 |
| 1  | 107  | 11.5  | 4.88 |
| 5  | 404  | 45.1  | 6.37 |
| 2  | 323  | 35.2  | 4.81 |
| 1  | 312  | 33.7  | 5.54 |
| 4  | 726  | 80    | 5.31 |
| 3  | 263  | 30    | 5.58 |
| 4  | 315  | 34.2  | 5.44 |
| 5  | 360  | 38.6  | 6.89 |
| 3  | 446  | 49.9  | 4.98 |
| 2  | 228  | 25.2  | 5.95 |
| 3  | 561  | 62.3  | 6.68 |
| 1  | 304  | 33.5  | 6.58 |
| 2  | 329  | 36.5  | 5.44 |
| 15 | 599  | 66.5  | 5.59 |
| 1  | 324  | 35.9  | 7.33 |
| 2  | 363  | 39.5  | 5.29 |
| 5  | 396  | 42.7  | 6.81 |
| 1  | 252  | 26.8  | 6.13 |
| 5  | 586  | 65.8  | 4.78 |
| 7  | 678  | 72.8  | 5.41 |
| 1  | 213  | 22.5  | 6.93 |
| 2  | 78   | 8.3   | 9.25 |
| 1  | 312  | 34.6  | 5.39 |
| 1  | 333  | 36.5  | 6.19 |
| 6  | 371  | 41    | 6.7  |
| 5  | 901  | 103.1 | 6.49 |
| 2  | 565  | 63.2  | 5.31 |
| 12 | 759  | 82.4  | 5.5  |
| 1  | 533  | 60.2  | 5.59 |
| 2  | 263  | 30.4  | 4.77 |
| 5  | 567  | 62.5  | 6.28 |
| 3  | 312  | 32.3  | 5.77 |
| 2  | 753  | 84.6  | 5.92 |
| 26 | 1227 | 135.9 | 5.07 |
| 1  | 343  | 37.8  | 6.38 |
| 6  | 271  | 29.4  | 5.29 |
| 10 | 1148 | 129.9 | 6.16 |
| 1  | 277  | 31.3  | 8.76 |
| 4  | 474  | 53.6  | 5.34 |
| 1  | 270  | 29.6  | 5.38 |
| 1  | 248  | 27.8  | 5.85 |
| 3  | 251  | 28    | 5.05 |
| 3  | 406  | 44.3  | 6.23 |

|    |      |       |      |
|----|------|-------|------|
| 2  | 629  | 69.5  | 6.64 |
| 1  | 411  | 44    | 5.14 |
| 1  | 457  | 49.8  | 5.88 |
| 2  | 176  | 20.6  | 6.21 |
| 2  | 265  | 30.3  | 4.73 |
| 1  | 372  | 40.9  | 5.36 |
| 13 | 1486 | 170.1 | 5.35 |
| 3  | 234  | 27    | 5    |
| 7  | 440  | 50.5  | 4.89 |
| 3  | 419  | 44.8  | 6.16 |
| 1  | 495  | 53.3  | 5.73 |
| 1  | 355  | 37.8  | 9.73 |
| 5  | 853  | 95.2  | 5.55 |
| 1  | 410  | 47.3  | 5.63 |
| 7  | 335  | 37.8  | 4.97 |
| 2  | 379  | 40.1  | 9.51 |
| 3  | 236  | 25.8  | 5.1  |
| 3  | 294  | 33.6  | 4.74 |
| 1  | 504  | 55.2  | 5.94 |
| 1  | 469  | 52.2  | 6.49 |
| 1  | 153  | 17.4  | 5.14 |
| 4  | 220  | 25    | 5.74 |
| 25 | 596  | 68.2  | 6.42 |
| 10 | 445  | 49.3  | 6.86 |
| 12 | 908  | 100.2 | 6.25 |
| 6  | 180  | 20.5  | 5.48 |
| 21 | 495  | 54.8  | 4.64 |
| 1  | 390  | 43.3  | 4.88 |
| 22 | 933  | 105   | 6.49 |
| 9  | 405  | 44    | 5.81 |
| 29 | 887  | 99.6  | 5.68 |
| 50 | 630  | 66.1  | 5.17 |
| 7  | 346  | 37.2  | 6.42 |
| 5  | 239  | 27.3  | 6.39 |
| 14 | 680  | 77.1  | 5.26 |
| 4  | 337  | 37.2  | 6.1  |
| 6  | 334  | 37.2  | 7.75 |
| 3  | 112  | 12    | 7.87 |
| 1  | 269  | 28.1  | 5.9  |
| 7  | 173  | 18.8  | 6.8  |
| 2  | 283  | 31.6  | 6.28 |
| 4  | 752  | 83.8  | 6.68 |
| 8  | 630  | 70.2  | 5.66 |
| 2  | 540  | 59.6  | 5.71 |
| 2  | 427  | 46.2  | 5.92 |
| 10 | 485  | 52.9  | 5.39 |
| 1  | 443  | 50.1  | 5.99 |
| 20 | 760  | 85.3  | 6.01 |
| 3  | 546  | 58.3  | 5.71 |
| 2  | 386  | 43.1  | 6.68 |
| 2  | 346  | 39    | 5.97 |

|    |      |       |       |
|----|------|-------|-------|
| 12 | 241  | 27.4  | 5.31  |
| 2  | 815  | 93.1  | 5.9   |
| 17 | 797  | 90.5  | 7.39  |
| 5  | 711  | 77.1  | 5.21  |
| 2  | 378  | 43    | 5.3   |
| 2  | 164  | 18.1  | 5.8   |
| 26 | 623  | 68.1  | 5.07  |
| 16 | 688  | 80.4  | 8.92  |
| 19 | 792  | 87.4  | 5.06  |
| 4  | 513  | 58.1  | 7.14  |
| 1  | 293  | 31.9  | 4.48  |
| 1  | 417  | 44.6  | 5.64  |
| 4  | 367  | 39    | 6.54  |
| 1  | 232  | 25.9  | 9.64  |
| 1  | 451  | 52.8  | 8.98  |
| 6  | 748  | 83.7  | 5.78  |
| 11 | 575  | 63.5  | 4.87  |
| 5  | 714  | 77.1  | 5.41  |
| 8  | 150  | 16.9  | 5.29  |
| 1  | 94   | 10.2  | 6.27  |
| 8  | 505  | 56.5  | 5.52  |
| 4  | 212  | 23.2  | 5.87  |
| 15 | 1295 | 141.3 | 5.41  |
| 1  | 345  | 36.8  | 4.96  |
| 5  | 237  | 27    | 5.16  |
| 4  | 456  | 51.5  | 6.01  |
| 8  | 432  | 47.3  | 5.49  |
| 3  | 341  | 38.2  | 6.74  |
| 4  | 392  | 42.4  | 5.71  |
| 1  | 280  | 31.9  | 7.01  |
| 16 | 1320 | 143.7 | 5.99  |
| 5  | 472  | 53.1  | 4.93  |
| 4  | 545  | 60.3  | 5.94  |
| 4  | 305  | 33.7  | 5.64  |
| 3  | 460  | 49.4  | 7.24  |
| 18 | 968  | 109.7 | 5.17  |
| 3  | 498  | 56.4  | 6.48  |
| 10 | 577  | 63.3  | 5.6   |
| 3  | 744  | 83.8  | 6.77  |
| 8  | 365  | 41.2  | 4.75  |
| 3  | 529  | 59.5  | 5.97  |
| 3  | 421  | 47.1  | 7.68  |
| 6  | 419  | 47    | 7.25  |
| 1  | 313  | 34.7  | 9.23  |
| 4  | 441  | 49.6  | 5.48  |
| 11 | 736  | 82.8  | 5.97  |
| 7  | 376  | 43.5  | 4.81  |
| 3  | 165  | 17.7  | 8.98  |
| 1  | 142  | 14.9  | 9.63  |
| 1  | 142  | 16    | 9.91  |
| 1  | 123  | 13.5  | 10.42 |

|    |      |       |       |
|----|------|-------|-------|
| 7  | 144  | 15    | 11.18 |
| 2  | 136  | 15.3  | 11.22 |
| 3  | 127  | 14.4  | 11.05 |
| 1  | 117  | 12.8  | 10.42 |
| 1  | 115  | 13.1  | 10.62 |
| 3  | 118  | 13.5  | 11.47 |
| 4  | 273  | 29.8  | 10.93 |
| 1  | 59   | 6.5   | 10.96 |
| 1  | 65   | 7.3   | 11.78 |
| 1  | 201  | 22.1  | 9.73  |
| 17 | 179  | 20.3  | 9.48  |
| 3  | 177  | 18.9  | 9.7   |
| 1  | 209  | 23.3  | 9.41  |
| 1  | 396  | 44.3  | 7.72  |
| 3  | 384  | 43.1  | 6.99  |
| 7  | 326  | 37.1  | 6.81  |
| 5  | 644  | 72.4  | 5.62  |
| 3  | 226  | 25.5  | 6.89  |
| 50 | 1061 | 118.1 | 5.62  |
| 2  | 238  | 25.3  | 5.71  |
| 2  | 813  | 92.1  | 8.62  |
| 1  | 337  | 36.2  | 5.8   |
| 3  | 477  | 54    | 4.75  |
| 3  | 296  | 32.3  | 6.54  |
| 6  | 329  | 36.5  | 5.06  |
| 93 | 1342 | 150.5 | 5.26  |
| 29 | 1407 | 155.1 | 7.08  |
| 17 | 613  | 70.2  | 4.79  |
| 4  | 330  | 37.9  | 4.94  |
| 4  | 161  | 17.3  | 4.2   |
| 1  | 129  | 13.8  | 11.33 |
| 3  | 124  | 13.8  | 11    |
| 4  | 118  | 13.1  | 10.78 |
| 1  | 101  | 11.6  | 11.17 |
| 1  | 84   | 9.7   | 9.6   |
| 3  | 75   | 9     | 10.59 |
| 5  | 557  | 61.1  | 4.98  |
| 7  | 241  | 26.7  | 7.14  |
| 3  | 233  | 26    | 10.27 |
| 6  | 206  | 23.5  | 10.05 |
| 1  | 167  | 17.6  | 10.11 |
| 4  | 131  | 15.2  | 5.39  |
| 1  | 130  | 14.1  | 9.42  |
| 3  | 130  | 14.8  | 10.95 |
| 4  | 429  | 48.3  | 7.52  |
| 1  | 404  | 45.9  | 6.06  |
| 5  | 239  | 26.7  | 5.66  |
| 1  | 455  | 48.7  | 5.8   |
| 7  | 901  | 102   | 5.6   |
| 4  | 155  | 17.3  | 4.37  |
| 14 | 410  | 44.1  | 6.35  |

|    |      |       |      |
|----|------|-------|------|
| 4  | 322  | 35    | 5.72 |
| 3  | 362  | 39.8  | 5.59 |
| 5  | 269  | 30.8  | 4.56 |
| 2  | 198  | 22.8  | 8.72 |
| 1  | 155  | 15.6  | 9.31 |
| 1  | 193  | 21.3  | 5.95 |
| 2  | 658  | 73.9  | 4.94 |
| 3  | 702  | 79.3  | 8.73 |
| 7  | 453  | 49.8  | 9.51 |
| 1  | 165  | 18.3  | 4.55 |
| 1  | 1120 | 113.7 | 7.65 |
| 4  | 466  | 51.5  | 6.57 |
| 16 | 388  | 41.4  | 5.52 |
| 7  | 289  | 29.8  | 6.79 |
| 1  | 495  | 54.7  | 5.16 |
| 2  | 267  | 29.2  | 6.96 |
| 27 | 876  | 96    | 5.81 |
| 3  | 461  | 52.2  | 5.57 |
| 10 | 590  | 65.9  | 5.69 |
| 2  | 471  | 53.8  | 5.94 |
| 3  | 327  | 36.8  | 6.2  |
| 9  | 795  | 87.3  | 5.3  |
| 2  | 303  | 34.7  | 5.05 |
| 35 | 689  | 76.8  | 5.44 |
| 8  | 424  | 47    | 5.91 |
| 12 | 938  | 104.2 | 6.01 |
| 14 | 505  | 57.6  | 5.24 |
| 16 | 505  | 57.8  | 5.24 |
| 14 | 860  | 97.2  | 5.3  |
| 12 | 677  | 76.2  | 5.86 |
| 12 | 466  | 52.5  | 5.31 |
| 2  | 554  | 63.4  | 6.28 |
| 3  | 577  | 64.6  | 5.49 |
| 6  | 430  | 48.4  | 5.5  |
| 12 | 642  | 74    | 6.19 |
| 25 | 951  | 108.1 | 5.34 |
| 1  | 334  | 37.4  | 6.74 |
| 2  | 424  | 47.5  | 5.81 |
| 3  | 529  | 59.3  | 5.22 |
| 7  | 1170 | 134   | 5.94 |
| 16 | 317  | 35.2  | 5.21 |
| 1  | 89   | 9.7   | 6.09 |
| 2  | 171  | 18.4  | 5.22 |
| 2  | 341  | 37.2  | 6.38 |
| 3  | 482  | 54.9  | 6.61 |
| 1  | 281  | 30.8  | 4.69 |
| 4  | 432  | 48.2  | 4.88 |
| 8  | 663  | 72.2  | 5.67 |
| 2  | 421  | 43.1  | 9.07 |
| 1  | 875  | 99.1  | 6.02 |
| 1  | 246  | 27    | 6    |



|    |      |       |      |
|----|------|-------|------|
| 1  | 397  | 43    | 6.09 |
| 3  | 270  | 30.4  | 8.53 |
| 2  | 349  | 39.1  | 6.57 |
| 1  | 607  | 67.3  | 5.33 |
| 2  | 373  | 42    | 6.01 |
| 2  | 513  | 57.6  | 5.78 |
| 3  | 264  | 30.5  | 6.02 |
| 1  | 391  | 42.9  | 7.15 |
| 3  | 388  | 43.6  | 6.46 |
| 2  | 208  | 22.5  | 5.47 |
| 2  | 144  | 16.1  | 5.29 |
| 7  | 635  | 72    | 5.5  |
| 5  | 940  | 103.8 | 6.64 |
| 13 | 673  | 76.2  | 5.24 |
| 1  | 720  | 81.9  | 6.24 |
| 1  | 257  | 29.3  | 5.14 |
| 2  | 483  | 55.9  | 6.49 |
| 2  | 246  | 27.9  | 9.55 |
| 2  | 326  | 36.4  | 5.59 |
| 4  | 298  | 33.8  | 9.39 |
| 3  | 298  | 34.2  | 8.81 |
| 1  | 255  | 28.6  | 7.96 |
| 1  | 246  | 28    | 9.06 |
| 1  | 243  | 27.8  | 5    |
| 1  | 192  | 20.9  | 8.63 |
| 2  | 152  | 17.4  | 6    |
| 1  | 269  | 29.4  | 8.82 |
| 1  | 155  | 17.5  | 4.3  |
| 2  | 427  | 46.1  | 6    |
| 4  | 332  | 36.4  | 5.6  |
| 4  | 361  | 38.9  | 6.43 |
| 3  | 223  | 25    | 6.52 |
| 4  | 530  | 59.8  | 5.08 |
| 5  | 586  | 65.6  | 4.5  |
| 6  | 184  | 20.7  | 4.27 |
| 1  | 350  | 39.8  | 6.47 |
| 3  | 373  | 42.6  | 4.83 |
| 2  | 363  | 39.6  | 4.96 |
| 4  | 132  | 14.2  | 7.88 |
| 1  | 222  | 24.4  | 8.32 |
| 4  | 653  | 72.7  | 7.17 |
| 1  | 313  | 34.3  | 9.55 |
| 1  | 94   | 10.4  | 8.68 |
| 10 | 502  | 54.7  | 5.17 |
| 17 | 1018 | 113.2 | 7.11 |
| 4  | 341  | 38.5  | 5.2  |
| 1  | 246  | 26.4  | 4.88 |
| 8  | 453  | 51.2  | 6.19 |
| 1  | 156  | 18    | 9.1  |
| 3  | 488  | 54    | 6.14 |
| 1  | 443  | 51.4  | 8.62 |

|      |      |       |      |
|------|------|-------|------|
| 1    | 1653 | 181.5 | 5.43 |
| 1    | 293  | 33.2  | 6.77 |
| 14   | 454  | 50.9  | 6.48 |
| 1    | 72   | 7.9   | 4.83 |
| 1    | 95   | 10.9  | 9.17 |
| 1    | 386  | 45    | 4.77 |
| 3    | 433  | 48.4  | 6.13 |
| 2    | 284  | 32.5  | 7.24 |
| 2    | 335  | 37.1  | 6.47 |
| 3    | 132  | 15    | 5.88 |
| 3    | 240  | 26.8  | 5.66 |
| 2    | 637  | 71.8  | 5.73 |
| 8    | 773  | 85.1  | 6.3  |
| 1    | 540  | 61.1  | 6.54 |
| 6    | 236  | 25.6  | 6.55 |
| 2    | 344  | 40.5  | 9.31 |
| 1    | 548  | 61.5  | 7.99 |
| 1    | 230  | 26.1  | 6.15 |
| 4    | 235  | 26.7  | 6.54 |
| 3    | 169  | 19    | 6.83 |
| 2    | 199  | 22.7  | 5.39 |
| 1    | 329  | 37.1  | 6.35 |
| 3    | 196  | 22.6  | 4.53 |
| 4    | 191  | 21.9  | 5.08 |
| 2    | 117  | 12    | 5.78 |
| 1    | 318  | 35.6  | 4.92 |
| 1    | 225  | 25.3  | 4.91 |
| 4    | 555  | 62.4  | 5.6  |
| 3    | 287  | 31.4  | 5.9  |
| 3    | 393  | 41    | 5.87 |
| 1    | 318  | 35.9  | 8.22 |
| 6    | 191  | 20    | 8.98 |
| 2    | 184  | 20.2  | 5.55 |
| 1    | 1758 | 182.5 | 4.87 |
| 3    | 247  | 28.3  | 6.79 |
| 3    | 327  | 36.6  | 5.35 |
| 2    | 141  | 16.2  | 6.38 |
| 11   | 231  | 24.4  | 7.18 |
| 2876 | 1706 | 177.4 | 4.78 |
| 12   | 472  | 52.2  | 5.58 |
| 1    | 451  | 50.6  | 5.83 |
| 1    | 484  | 54    | 6.34 |
| 1    | 183  | 19.8  | 5.41 |
| 3    | 474  | 53.9  | 5.76 |
| 1    | 344  | 38.4  | 6.46 |
| 1    | 322  | 35.8  | 6.52 |
| 2    | 79   | 8.3   | 4.61 |
| 1    | 467  | 52    | 7.66 |
| 3    | 779  | 86    | 6    |
| 2    | 490  | 52.9  | 5.31 |
| 1    | 603  | 68.4  | 5.45 |

|   |      |       |       |
|---|------|-------|-------|
| 1 | 346  | 38.6  | 5.48  |
| 1 | 647  | 71.3  | 9.63  |
| 2 | 231  | 25.5  | 4.98  |
| 1 | 207  | 23.2  | 5.8   |
| 1 | 292  | 33.3  | 4.7   |
| 2 | 457  | 51.6  | 5.83  |
| 1 | 133  | 15.6  | 6.79  |
| 2 | 848  | 97.5  | 6.21  |
| 2 | 291  | 32.5  | 6.09  |
| 3 | 354  | 39.2  | 6.3   |
| 1 | 407  | 44.3  | 5.29  |
| 1 | 229  | 26.1  | 5.67  |
| 1 | 356  | 38.2  | 4.98  |
| 1 | 204  | 23.3  | 4.97  |
| 1 | 376  | 41.1  | 7.84  |
| 4 | 643  | 71.1  | 6.84  |
| 1 | 167  | 18.7  | 6.11  |
| 1 | 211  | 23.5  | 8.16  |
| 1 | 419  | 46.6  | 9.91  |
| 1 | 114  | 12.1  | 4.31  |
| 1 | 204  | 22.7  | 7.33  |
| 1 | 387  | 40.8  | 6.8   |
| 1 | 91   | 10.9  | 6.3   |
| 2 | 233  | 26.2  | 5.49  |
| 1 | 1329 | 146.6 | 5.02  |
| 1 | 348  | 39.6  | 6.47  |
| 1 | 190  | 20.8  | 5.68  |
| 1 | 560  | 58.9  | 9.25  |
| 1 | 890  | 102.3 | 6.7   |
| 1 | 358  | 40.8  | 5.6   |
| 1 | 623  | 69.1  | 7.49  |
| 1 | 246  | 27.8  | 6.43  |
| 2 | 393  | 42.9  | 4.82  |
| 1 | 88   | 10    | 6.6   |
| 1 | 301  | 34.4  | 8.95  |
| 1 | 396  | 45.6  | 9.52  |
| 1 | 387  | 45.1  | 9.74  |
| 1 | 375  | 42.8  | 10.05 |
| 1 | 411  | 47.5  | 9.89  |
| 1 | 320  | 34.8  | 5.72  |
| 2 | 398  | 43.1  | 5.97  |
| 1 | 284  | 30.8  | 6.8   |
| 1 | 289  | 32.3  | 6.67  |
| 1 | 466  | 49.9  | 6.32  |
| 1 | 1538 | 169.3 | 6.76  |
| 2 | 207  | 23.5  | 8.84  |
| 1 | 241  | 26.8  | 5.99  |
| 2 | 193  | 21.3  | 8.68  |
| 1 | 341  | 36    | 6.54  |
| 4 | 694  | 78.5  | 6.58  |
| 1 | 478  | 53    | 5.36  |

|   |      |       |       |
|---|------|-------|-------|
| 1 | 723  | 80.4  | 6.18  |
| 1 | 459  | 53.1  | 5.6   |
| 1 | 1037 | 111.4 | 5.47  |
| 1 | 365  | 40.4  | 9.03  |
| 1 | 347  | 36.9  | 5.26  |
| 2 | 582  | 64.4  | 8.54  |
| 1 | 540  | 60.3  | 6.34  |
| 1 | 828  | 93    | 8.03  |
| 1 | 217  | 23.9  | 6.23  |
| 2 | 847  | 93.1  | 6.15  |
| 2 | 189  | 21.4  | 5.36  |
| 1 | 377  | 41.4  | 6.44  |
| 1 | 166  | 18.6  | 5.68  |
| 1 | 511  | 57.9  | 7.21  |
| 1 | 143  | 15.1  | 5.86  |
| 1 | 474  | 53.6  | 6.86  |
| 1 | 269  | 29.7  | 6.52  |
| 2 | 310  | 33.9  | 9.94  |
| 1 | 378  | 41.3  | 6.7   |
| 1 | 472  | 53.6  | 7.21  |
| 1 | 500  | 54.8  | 7.24  |
| 1 | 322  | 35.9  | 5.73  |
| 1 | 325  | 37    | 5.73  |
| 2 | 277  | 31.2  | 6.43  |
| 1 | 113  | 12.6  | 5.83  |
| 1 | 831  | 92.1  | 5.31  |
| 1 | 495  | 53.4  | 6.06  |
| 2 | 356  | 39.4  | 5.24  |
| 1 | 251  | 29.3  | 9.42  |
| 1 | 360  | 40.5  | 5.26  |
| 1 | 265  | 30.9  | 9.92  |
| 2 | 311  | 33.8  | 4.97  |
| 1 | 234  | 24.7  | 9.64  |
| 1 | 70   | 7.9   | 9.32  |
| 1 | 209  | 22.2  | 9.91  |
| 1 | 362  | 37.5  | 5.73  |
| 1 | 489  | 55.3  | 5.87  |
| 1 | 289  | 33.1  | 7.17  |
| 1 | 284  | 32.4  | 5.94  |
| 1 | 89   | 10.3  | 10.4  |
| 1 | 71   | 8.5   | 11.15 |
| 1 | 347  | 36.7  | 5.43  |
| 1 | 364  | 41.1  | 6.35  |
| 1 | 437  | 46.7  | 8.9   |
| 1 | 268  | 29.3  | 5.83  |
| 2 | 107  | 12.9  | 9.89  |
| 1 | 264  | 30.4  | 5.39  |
| 1 | 178  | 19    | 5.58  |
| 1 | 160  | 18.3  | 9.89  |
| 1 | 428  | 47.3  | 6.98  |
| 2 | 572  | 63.7  | 5.24  |

|   |     |       |      |
|---|-----|-------|------|
| 1 | 256 | 26.9  | 5.58 |
| 1 | 325 | 35    | 4.72 |
| 1 | 428 | 47.1  | 5.4  |
| 1 | 698 | 80.3  | 7.27 |
| 2 | 865 | 97.3  | 8.46 |
| 1 | 342 | 37.8  | 9.03 |
| 1 | 475 | 50.4  | 5.44 |
| 1 | 247 | 28    | 8.6  |
| 1 | 565 | 63.6  | 5.9  |
| 1 | 314 | 35.1  | 5.97 |
| 1 | 260 | 29.6  | 7.09 |
| 1 | 497 | 55.6  | 5.5  |
| 1 | 422 | 47.6  | 8.88 |
| 1 | 213 | 24.3  | 6.87 |
| 1 | 316 | 35.7  | 5.31 |
| 2 | 372 | 43.2  | 8.92 |
| 1 | 376 | 42.2  | 6.35 |
| 1 | 216 | 24.8  | 9.33 |
| 1 | 274 | 29.9  | 8.31 |
| 1 | 181 | 20.9  | 5.11 |
| 1 | 304 | 33.8  | 7.4  |
| 1 | 266 | 30    | 9.6  |
| 2 | 271 | 31.8  | 6.13 |
| 1 | 406 | 47.8  | 7.81 |
| 1 | 218 | 23.9  | 5.24 |
| 1 | 753 | 81.5  | 5.62 |
| 1 | 741 | 81.9  | 9.2  |
| 1 | 561 | 60.3  | 8.34 |
| 1 | 158 | 17.7  | 4.34 |
| 1 | 171 | 19    | 6.54 |
| 1 | 337 | 38.1  | 8.63 |
| 1 | 330 | 38.3  | 9.35 |
| 1 | 615 | 67.8  | 8.48 |
| 1 | 418 | 42.8  | 4.54 |
| 1 | 648 | 71.6  | 8.62 |
| 1 | 334 | 35.6  | 5.33 |
| 2 | 826 | 92.2  | 6.01 |
| 1 | 239 | 26.6  | 9.72 |
| 1 | 199 | 22.7  | 5.78 |
| 1 | 179 | 20.2  | 6.62 |
| 1 | 237 | 27.3  | 6.54 |
| 1 | 469 | 54    | 8.59 |
| 1 | 149 | 16.1  | 6    |
| 1 | 259 | 28.7  | 6.9  |
| 1 | 147 | 15.9  | 6.55 |
| 1 | 639 | 69    | 6.37 |
| 1 | 541 | 60.7  | 7.18 |
| 1 | 911 | 100.7 | 6.16 |
| 1 | 112 | 13.1  | 6.55 |
| 1 | 155 | 17.2  | 6.95 |
| 1 | 201 | 22.1  | 6.07 |

|   |     |      |      |
|---|-----|------|------|
| 1 | 298 | 31.1 | 6.29 |
| 1 | 69  | 8.3  | 5.55 |
| 1 | 604 | 69.5 | 6.14 |
| 1 | 301 | 32.7 | 5.49 |
| 1 | 248 | 27.3 | 5.01 |
| 1 | 181 | 19.9 | 6.35 |
| 3 | 304 | 34.8 | 7.83 |
| 1 | 284 | 30.5 | 9.22 |
| 1 | 218 | 24.4 | 8.7  |
| 1 | 347 | 38.7 | 7.25 |
